# Supplementary material for: Sniffing out significant “Pee values”: genome wide association study of asparagus anosmia
Source: PubMed Central journal article supplement — BMJ. 2016 Dec 13;355:i6071. doi: 10.1136/bmj.i6071 (PMC5154975; doi:10.1136/bmj.i6071), 2016-12-13

**Supplemental Figure 1:** QQ plot to show distribution of the observed and expected p-values of the different platforms used to generate the genetic data a) Affymetrix platform, b) the Illumina, and c) the combination of both platforms

a) Affymetrix

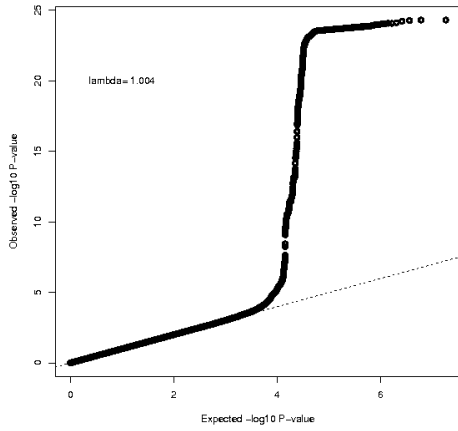

b) Illumina

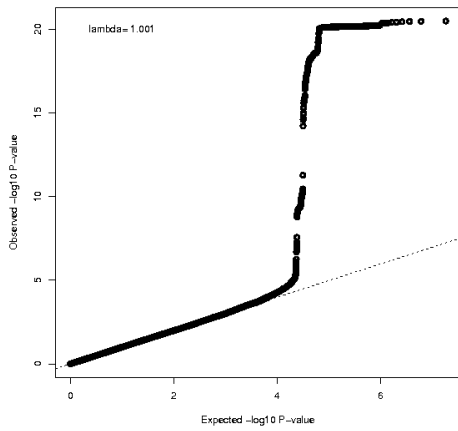

c) Affymetrix and Illumina

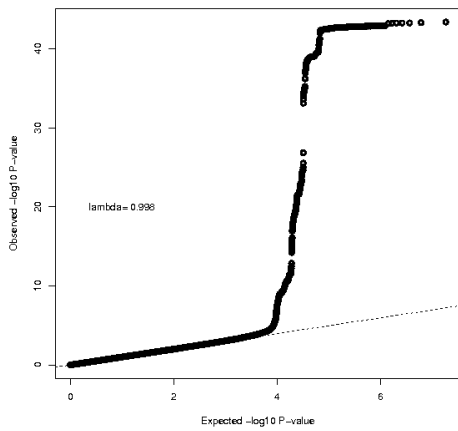

**Supplemental Figure 2a.** Genetic association with asparagus anosmia in a region on chromosome 1 flanking genome-wide significant association signals, (a) 3' and (b) 5' of a recombination hotspot near *OR2M2*. In each plot, SNPs are color-coded depending on their linkage disequilibrium with one of the three independent SNPs identified by conditional analyses: rs6689553 (red) and rs71538191 (blue) in (a) and rs13373863 in (b).

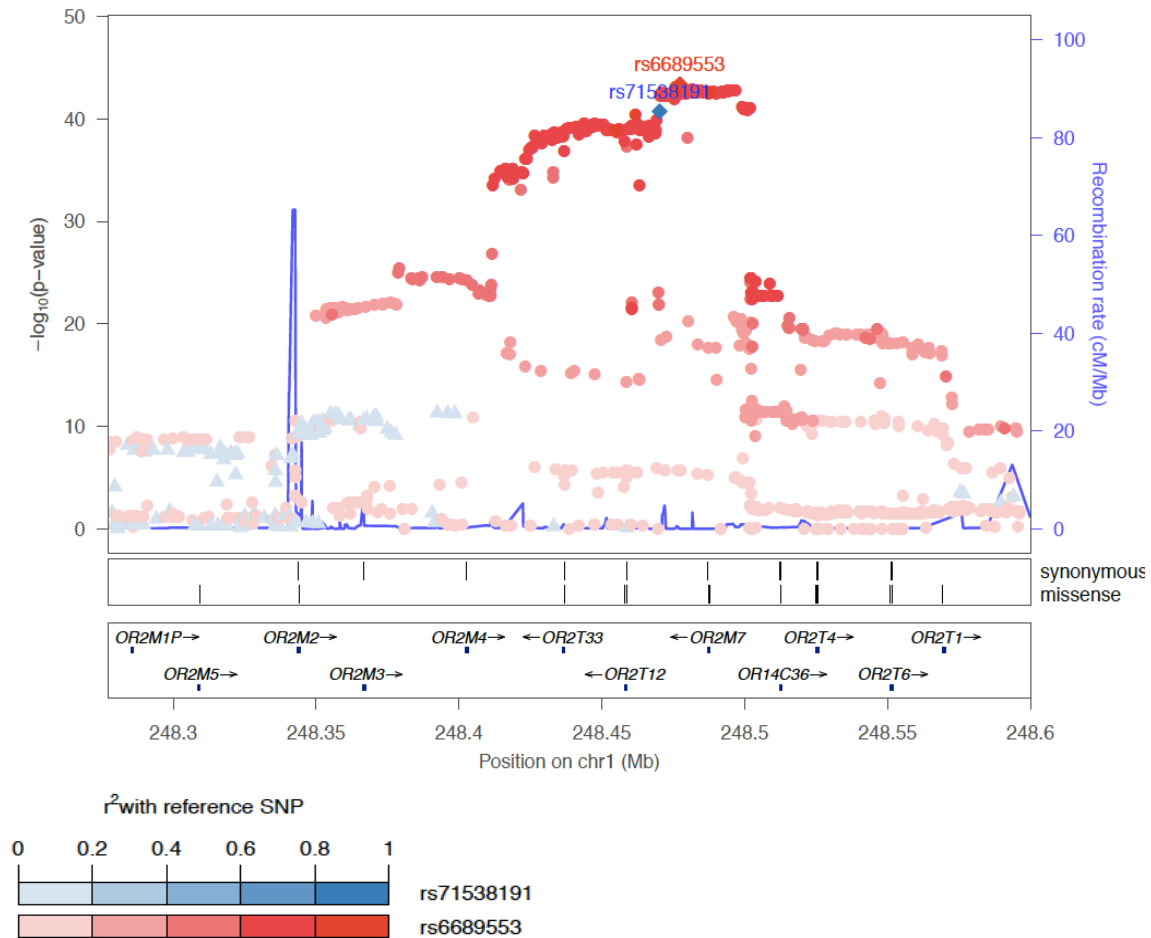

Supplemental Figure 2b.

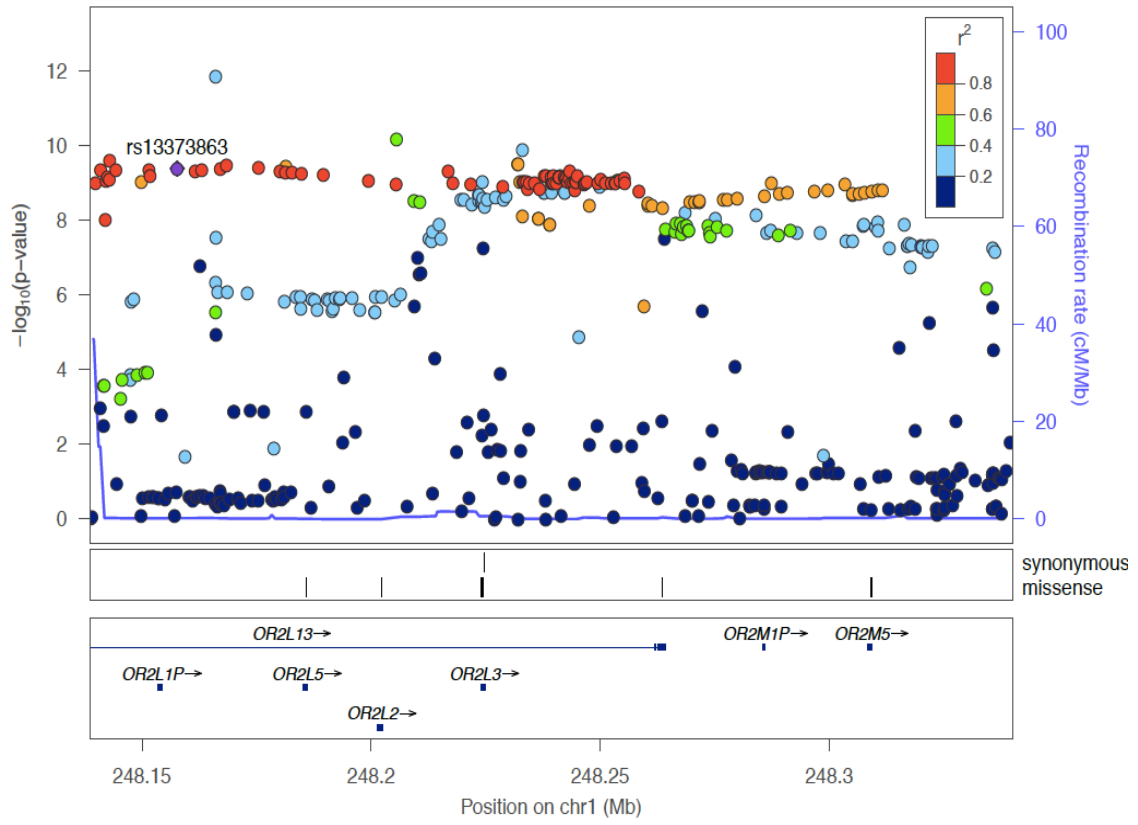

Supplement: mars035016.wf1_default.pdf [file mars035016.wf1_default.pdf]
