# Supplementary material for: Sniffing out significant “Pee values”: genome wide association study of asparagus anosmia
Source: PubMed Central journal article supplement — BMJ. 2016 Dec 13;355:i6071. doi: 10.1136/bmj.i6071 (PMC5154975; doi:10.1136/bmj.i6071), 2016-12-13
Supplement: mars035016.wt1_default.pdf [file mars035016.wt1_default.pdf]

**Supplemental Table 1: SNPs marginally statistically significantly associated (at genome-wide significance) with asparagus anosmia**

| SNP        | A1 | A2 | Frequency<br>A1 | Marginal Beta | Marginal<br>SE | Marginal p-value |
|------------|----|----|-----------------|---------------|----------------|------------------|
| rs6689553  | T  | C  | 0.32            | 0.1376        | 0.0099         | 4.26E-44         |
| rs6678934  | A  | C  | 0.72            | -0.131        | 0.0094         | 5.20E-44         |
| rs6686797  | A  | G  | 0.28            | 0.1302        | 0.0094         | 5.59E-44         |
| rs6672079  | A  | G  | 0.68            | -0.1374       | 0.0099         | 5.64E-44         |
| rs6689570  | T  | C  | 0.28            | 0.1307        | 0.0094         | 5.89E-44         |
| rs4310471  | A  | G  | 0.28            | 0.1321        | 0.0095         | 6.70E-44         |
| rs10788778 | T  | C  | 0.26            | 0.1286        | 0.0093         | 1.25E-43         |
| rs4593862  | T  | G  | 0.74            | -0.1286       | 0.0093         | 1.32E-43         |
| rs9660769  | C  | G  | 0.74            | -0.1286       | 0.0093         | 1.35E-43         |
| rs6663817  | A  | G  | 0.26            | 0.1286        | 0.0093         | 1.35E-43         |
| rs10158431 | A  | G  | 0.26            | 0.128         | 0.0092         | 1.37E-43         |
| rs4481887  | A  | G  | 0.26            | 0.128         | 0.0092         | 1.41E-43         |
| rs4409693  | T  | C  | 0.74            | -0.1293       | 0.0093         | 1.42E-43         |
| rs4554750  | C  | G  | 0.26            | 0.128         | 0.0092         | 1.43E-43         |
| rs10749653 | C  | G  | 0.26            | 0.1279        | 0.0092         | 1.43E-43         |
| rs10788782 | A  | C  | 0.74            | -0.1279       | 0.0092         | 1.45E-43         |
| rs6697863  | A  | G  | 0.74            | -0.1279       | 0.0092         | 1.47E-43         |
| rs7553333  | C  | G  | 0.26            | 0.1284        | 0.0093         | 1.51E-43         |
| rs6681423  | A  | C  | 0.74            | -0.1278       | 0.0092         | 1.56E-43         |
| rs6671789  | A  | G  | 0.74            | -0.1278       | 0.0092         | 1.57E-43         |
| rs7545751  | T  | C  | 0.26            | 0.1288        | 0.0093         | 1.60E-43         |
| rs4309013  | T  | C  | 0.73            | -0.1268       | 0.0092         | 1.61E-43         |
| rs6587450  | A  | T  | 0.73            | -0.1268       | 0.0092         | 1.62E-43         |
| rs4427440  | A  | T  | 0.73            | -0.127        | 0.0092         | 1.63E-43         |
| rs10888362 | A  | G  | 0.74            | -0.1278       | 0.0092         | 1.64E-43         |
| rs10788781 | T  | C  | 0.74            | -0.1279       | 0.0092         | 1.65E-43         |
| rs10158180 | T  | C  | 0.73            | -0.1268       | 0.0092         | 1.66E-43         |
| rs4916087  | T  | C  | 0.27            | 0.1271        | 0.0092         | 1.67E-43         |
| rs12039929 | A  | G  | 0.73            | -0.1268       | 0.0092         | 1.68E-43         |
| rs12042602 | T  | C  | 0.73            | -0.1268       | 0.0092         | 1.68E-43         |
| rs12568122 | T  | C  | 0.74            | -0.1287       | 0.0093         | 1.69E-43         |
| rs12044126 | T  | C  | 0.27            | 0.1269        | 0.0092         | 1.70E-43         |
| rs6689556  | T  | C  | 0.27            | 0.1315        | 0.0095         | 1.72E-43         |
| rs4457616  | A  | G  | 0.26            | 0.1302        | 0.0094         | 1.74E-43         |
| rs7515080  | A  | G  | 0.26            | 0.1279        | 0.0092         | 1.75E-43         |
| rs6689193  | A  | T  | 0.73            | -0.1268       | 0.0092         | 1.77E-43         |
| rs6587452  | T  | C  | 0.74            | -0.1277       | 0.0092         | 1.84E-43         |
| rs4244187  | T  | C  | 0.27            | 0.1268        | 0.0092         | 1.84E-43         |
| rs4244186  | A  | G  | 0.27            | 0.1268        | 0.0092         | 1.86E-43         |
| rs9662041  | A  | T  | 0.27            | 0.1268        | 0.0092         | 1.90E-43         |
| rs4369256  | A  | G  | 0.74            | -0.1282       | 0.0093         | 1.92E-43         |
| rs4279879  | A  | G  | 0.27            | 0.1267        | 0.0092         | 1.94E-43         |
| rs4508046  | T  | C  | 0.26            | 0.1275        | 0.0092         | 1.95E-43         |
| rs7538645  | T  | C  | 0.73            | -0.1275       | 0.0092         | 1.95E-43         |

|            |   |   |      |         |        |          |
|------------|---|---|------|---------|--------|----------|
| rs4244184  | T | G | 0.73 | -0.1267 | 0.0092 | 1.98E-43 |
| rs6587451  | T | C | 0.27 | 0.1267  | 0.0092 | 1.99E-43 |
| rs11204632 | A | G | 0.73 | -0.1275 | 0.0092 | 2.04E-43 |
| rs11204631 | A | G | 0.27 | 0.1275  | 0.0092 | 2.04E-43 |
| rs10888360 | A | G | 0.74 | -0.1284 | 0.0093 | 2.05E-43 |
| rs11204636 | T | G | 0.74 | -0.1275 | 0.0092 | 2.07E-43 |
| rs4551626  | T | G | 0.73 | -0.1266 | 0.0092 | 2.13E-43 |
| rs6681336  | T | C | 0.73 | -0.1267 | 0.0092 | 2.15E-43 |
| rs4350233  | A | G | 0.73 | -0.1266 | 0.0092 | 2.16E-43 |
| rs6681339  | C | G | 0.27 | 0.1267  | 0.0092 | 2.17E-43 |
| rs6671702  | A | G | 0.73 | -0.1267 | 0.0092 | 2.17E-43 |
| rs4405158  | A | C | 0.27 | 0.1268  | 0.0092 | 2.19E-43 |
| rs6686911  | T | C | 0.26 | 0.1295  | 0.0094 | 2.20E-43 |
| rs6683717  | A | G | 0.26 | 0.1295  | 0.0094 | 2.20E-43 |
| rs4537598  | A | T | 0.73 | -0.1266 | 0.0092 | 2.21E-43 |
| rs10788780 | A | G | 0.73 | -0.1267 | 0.0092 | 2.22E-43 |
| rs12042598 | T | C | 0.73 | -0.1268 | 0.0092 | 2.22E-43 |
| rs11204637 | A | G | 0.73 | -0.1266 | 0.0092 | 2.23E-43 |
| rs4534422  | A | G | 0.27 | 0.1273  | 0.0092 | 2.26E-43 |
| rs6702113  | T | C | 0.27 | 0.1266  | 0.0092 | 2.30E-43 |
| rs5009868  | A | G | 0.26 | 0.1313  | 0.0095 | 2.30E-43 |
| rs12744455 | A | G | 0.27 | 0.127   | 0.0092 | 2.32E-43 |
| rs10788779 | C | G | 0.27 | 0.1268  | 0.0092 | 2.35E-43 |
| rs4244185  | A | G | 0.27 | 0.1266  | 0.0092 | 2.36E-43 |
| rs7555424  | A | G | 0.27 | 0.1267  | 0.0092 | 2.50E-43 |
| rs10157089 | A | G | 0.27 | 0.1265  | 0.0092 | 2.52E-43 |
| rs10888364 | T | G | 0.27 | 0.1266  | 0.0092 | 2.57E-43 |
| rs7555310  | A | G | 0.27 | 0.1266  | 0.0092 | 2.62E-43 |
| rs10788776 | T | C | 0.27 | 0.1273  | 0.0092 | 2.62E-43 |
| rs4409694  | T | C | 0.73 | -0.1272 | 0.0092 | 2.65E-43 |
| rs4244179  | A | T | 0.74 | -0.1326 | 0.0096 | 2.67E-43 |
| rs6686474  | A | C | 0.27 | 0.1285  | 0.0093 | 2.76E-43 |
| rs4558008  | T | C | 0.73 | -0.1275 | 0.0092 | 2.82E-43 |
| rs4448547  | C | G | 0.73 | -0.1272 | 0.0092 | 2.83E-43 |
| rs4282853  | A | G | 0.27 | 0.129   | 0.0094 | 2.87E-43 |
| rs4457614  | A | G | 0.27 | 0.129   | 0.0094 | 2.87E-43 |
| rs4540687  | C | G | 0.27 | 0.1287  | 0.0093 | 2.95E-43 |
| rs4341391  | A | G | 0.27 | 0.1287  | 0.0093 | 2.97E-43 |
| rs4423045  | T | C | 0.27 | 0.1273  | 0.0092 | 2.97E-43 |
| rs4307598  | T | C | 0.27 | 0.1295  | 0.0094 | 2.99E-43 |
| rs4244181  | A | G | 0.26 | 0.132   | 0.0096 | 3.08E-43 |
| rs4244182  | A | G | 0.26 | 0.1319  | 0.0096 | 3.09E-43 |
| rs4244180  | A | G | 0.26 | 0.1321  | 0.0096 | 3.09E-43 |
| rs4489592  | A | T | 0.26 | 0.1322  | 0.0096 | 3.15E-43 |
| rs4603165  | A | T | 0.73 | -0.1297 | 0.0094 | 3.16E-43 |
| rs10888358 | A | C | 0.74 | -0.1317 | 0.0096 | 3.17E-43 |
| rs4433430  | A | G | 0.73 | -0.1274 | 0.0092 | 3.35E-43 |
| rs4916130  | A | C | 0.71 | -0.1309 | 0.0095 | 3.37E-43 |
| rs6669290  | A | G | 0.73 | -0.1281 | 0.0093 | 3.39E-43 |

|            |   |   |      |         |        |          |
|------------|---|---|------|---------|--------|----------|
| rs4336885  | A | C | 0.27 | 0.13    | 0.0094 | 3.40E-43 |
| rs4297335  | T | C | 0.73 | -0.13   | 0.0094 | 3.44E-43 |
| rs4275482  | T | C | 0.27 | 0.1299  | 0.0094 | 3.45E-43 |
| rs6678798  | T | C | 0.73 | -0.1281 | 0.0093 | 3.45E-43 |
| rs7524700  | A | G | 0.27 | 0.1301  | 0.0094 | 3.46E-43 |
| rs4472780  | A | G | 0.73 | -0.1292 | 0.0094 | 3.50E-43 |
| rs4589143  | A | G | 0.26 | 0.1341  | 0.0097 | 3.58E-43 |
| rs4453081  | C | G | 0.27 | 0.1287  | 0.0093 | 3.66E-43 |
| rs4534423  | C | G | 0.73 | -0.1289 | 0.0094 | 3.68E-43 |
| rs4427438  | C | G | 0.73 | -0.1287 | 0.0093 | 3.72E-43 |
| rs4581306  | A | C | 0.73 | -0.1285 | 0.0093 | 3.77E-43 |
| rs10127803 | A | T | 0.27 | 0.1283  | 0.0093 | 3.78E-43 |
| rs4376768  | A | G | 0.73 | -0.1283 | 0.0093 | 3.81E-43 |
| rs10788775 | C | G | 0.26 | 0.1315  | 0.0095 | 3.82E-43 |
| rs10788774 | T | C | 0.26 | 0.1315  | 0.0095 | 3.86E-43 |
| rs4472779  | A | G | 0.73 | -0.1294 | 0.0094 | 3.90E-43 |
| rs28524655 | T | C | 0.73 | -0.1295 | 0.0094 | 3.94E-43 |
| rs4453080  | T | C | 0.27 | 0.1294  | 0.0094 | 3.95E-43 |
| rs12731721 | A | G | 0.73 | -0.1295 | 0.0094 | 3.95E-43 |
| rs4244183  | A | G | 0.74 | -0.1317 | 0.0096 | 4.00E-43 |
| rs4345830  | C | G | 0.73 | -0.1295 | 0.0094 | 4.03E-43 |
| rs4575112  | A | G | 0.27 | 0.13    | 0.0094 | 4.11E-43 |
| rs4292985  | A | T | 0.73 | -0.1298 | 0.0094 | 4.30E-43 |
| rs4564179  | T | C | 0.27 | 0.1301  | 0.0095 | 4.31E-43 |
| rs10749651 | T | C | 0.27 | 0.1299  | 0.0094 | 4.37E-43 |
| rs4523548  | T | G | 0.73 | -0.13   | 0.0094 | 4.39E-43 |
| rs4390209  | A | T | 0.27 | 0.1299  | 0.0094 | 4.42E-43 |
| rs4644528  | A | T | 0.73 | -0.1299 | 0.0094 | 4.47E-43 |
| rs7519334  | T | C | 0.73 | -0.1301 | 0.0095 | 4.49E-43 |
| rs4576683  | T | C | 0.27 | 0.1302  | 0.0095 | 4.64E-43 |
| rs4390208  | T | C | 0.73 | -0.1306 | 0.0095 | 5.07E-43 |
| rs4474293  | T | C | 0.27 | 0.1336  | 0.0097 | 5.22E-43 |
| rs4347240  | C | G | 0.27 | 0.1287  | 0.0094 | 9.61E-43 |
| rs10788784 | A | G | 0.26 | 0.1357  | 0.01   | 5.78E-42 |
| rs28795130 | A | C | 0.70 | -0.1437 | 0.0106 | 6.88E-42 |
| rs6662913  | A | G | 0.32 | 0.1493  | 0.011  | 7.53E-42 |
| rs10888370 | A | G | 0.74 | -0.1368 | 0.0101 | 8.74E-42 |
| rs6699764  | C | G | 0.74 | -0.138  | 0.0102 | 1.25E-41 |
| rs71538191 | C | G | 0.59 | -0.1633 | 0.0121 | 1.86E-41 |
| rs7415807  | T | G | 0.68 | -0.1422 | 0.0106 | 3.74E-41 |
| rs10218489 | T | G | 0.71 | -0.1421 | 0.0106 | 1.18E-40 |
| rs6676064  | C | G | 0.72 | -0.1333 | 0.01   | 2.23E-40 |
| rs10888345 | A | G | 0.29 | 0.1363  | 0.0102 | 2.27E-40 |
| rs6676061  | C | G | 0.72 | -0.1333 | 0.01   | 2.39E-40 |
| rs10888349 | T | C | 0.27 | 0.1331  | 0.01   | 3.03E-40 |
| rs4497248  | T | C | 0.27 | 0.1328  | 0.01   | 3.03E-40 |
| rs4278391  | T | C | 0.73 | -0.1328 | 0.01   | 3.09E-40 |
| rs6697456  | T | C | 0.63 | -0.1524 | 0.0115 | 3.21E-40 |
| rs10888343 | A | G | 0.27 | 0.1326  | 0.01   | 3.32E-40 |

|            |   |   |      |         |        |          |
|------------|---|---|------|---------|--------|----------|
| rs10888348 | C | G | 0.27 | 0.1326  | 0.01   | 3.41E-40 |
| rs4486480  | T | C | 0.74 | -0.1355 | 0.0102 | 3.50E-40 |
| rs6685871  | T | C | 0.70 | -0.1386 | 0.0105 | 3.64E-40 |
| rs10888347 | T | C | 0.27 | 0.1326  | 0.01   | 3.67E-40 |
| rs7543507  | T | C | 0.72 | -0.1331 | 0.01   | 3.82E-40 |
| rs9651176  | A | G | 0.27 | 0.1321  | 0.01   | 3.99E-40 |
| rs4916127  | A | G | 0.26 | 0.1331  | 0.01   | 4.51E-40 |
| rs10888344 | T | C | 0.27 | 0.1317  | 0.0099 | 4.72E-40 |
| rs9651175  | T | G | 0.73 | -0.1317 | 0.0099 | 4.82E-40 |
| rs4512685  | T | C | 0.73 | -0.1316 | 0.0099 | 5.03E-40 |
| rs6666903  | A | T | 0.73 | -0.1322 | 0.01   | 5.44E-40 |
| rs6587445  | A | G | 0.27 | 0.1311  | 0.0099 | 5.53E-40 |
| rs6699797  | T | C | 0.27 | 0.1315  | 0.0099 | 5.77E-40 |
| rs10888340 | T | C | 0.73 | -0.1311 | 0.0099 | 6.20E-40 |
| rs9651177  | T | C | 0.27 | 0.1311  | 0.0099 | 6.41E-40 |
| rs10788765 | T | C | 0.73 | -0.1309 | 0.0099 | 6.81E-40 |
| rs6587444  | T | C | 0.27 | 0.1309  | 0.0099 | 7.01E-40 |
| rs10888341 | T | C | 0.27 | 0.1311  | 0.0099 | 7.87E-40 |
| rs11204623 | A | G | 0.28 | 0.1361  | 0.0103 | 8.08E-40 |
| rs11204626 | A | T | 0.74 | -0.1326 | 0.01   | 8.48E-40 |
| rs7547808  | A | T | 0.28 | 0.1353  | 0.0103 | 8.98E-40 |
| rs4586010  | A | G | 0.73 | -0.1305 | 0.0099 | 9.04E-40 |
| rs6687975  | C | G | 0.62 | -0.156  | 0.0118 | 9.41E-40 |
| rs10788768 | A | G | 0.73 | -0.1326 | 0.01   | 9.66E-40 |
| rs7513161  | A | T | 0.27 | 0.1325  | 0.01   | 9.85E-40 |
| rs4916123  | T | G | 0.27 | 0.134   | 0.0102 | 9.92E-40 |
| rs4244172  | T | C | 0.26 | 0.1324  | 0.01   | 1.01E-39 |
| rs4525076  | T | G | 0.26 | 0.1327  | 0.0101 | 1.02E-39 |
| rs10888355 | A | G | 0.73 | -0.1326 | 0.0101 | 1.03E-39 |
| rs4381224  | A | T | 0.26 | 0.1327  | 0.0101 | 1.04E-39 |
| rs10736378 | T | G | 0.27 | 0.1323  | 0.01   | 1.05E-39 |
| rs10788770 | T | G | 0.26 | 0.1327  | 0.0101 | 1.05E-39 |
| rs12037921 | T | G | 0.27 | 0.1323  | 0.01   | 1.05E-39 |
| rs6685754  | A | C | 0.72 | -0.1339 | 0.0102 | 1.06E-39 |
| rs10788769 | T | C | 0.73 | -0.1326 | 0.0101 | 1.06E-39 |
| rs10888352 | A | G | 0.74 | -0.1332 | 0.0101 | 1.06E-39 |
| rs10736379 | A | T | 0.27 | 0.1323  | 0.01   | 1.06E-39 |
| rs6697735  | C | G | 0.74 | -0.1322 | 0.01   | 1.09E-39 |
| rs71538180 | T | G | 0.28 | 0.1342  | 0.0102 | 1.09E-39 |
| rs10888356 | A | G | 0.26 | 0.1322  | 0.01   | 1.10E-39 |
| rs4372295  | T | G | 0.74 | -0.1322 | 0.01   | 1.10E-39 |
| rs4916125  | A | T | 0.26 | 0.1323  | 0.01   | 1.10E-39 |
| rs4916126  | A | G | 0.74 | -0.1323 | 0.01   | 1.11E-39 |
| rs7517319  | A | C | 0.74 | -0.1323 | 0.01   | 1.11E-39 |
| rs4916128  | A | G | 0.74 | -0.1323 | 0.01   | 1.11E-39 |
| rs4360553  | A | G | 0.26 | 0.1323  | 0.01   | 1.11E-39 |
| rs6659039  | T | C | 0.74 | -0.1323 | 0.01   | 1.12E-39 |
| rs4344359  | A | G | 0.72 | -0.1394 | 0.0106 | 1.12E-39 |
| rs6663952  | A | G | 0.26 | 0.1323  | 0.01   | 1.12E-39 |

|             |   |   |      |         |        |          |
|-------------|---|---|------|---------|--------|----------|
| rs6666690   | T | C | 0.27 | 0.1323  | 0.01   | 1.14E-39 |
| rs6656551   | A | T | 0.26 | 0.1322  | 0.01   | 1.14E-39 |
| rs77950189  | A | C | 0.31 | 0.1396  | 0.0106 | 1.16E-39 |
| rs80260298  | A | G | 0.69 | -0.1396 | 0.0106 | 1.17E-39 |
| rs4430369   | A | G | 0.26 | 0.1324  | 0.01   | 1.20E-39 |
| rs4579792   | T | C | 0.26 | 0.1323  | 0.01   | 1.21E-39 |
| rs10888351  | A | G | 0.73 | -0.1322 | 0.01   | 1.23E-39 |
| rs4244178   | A | G | 0.26 | 0.1338  | 0.0102 | 1.30E-39 |
| rs4543835   | A | T | 0.27 | 0.1354  | 0.0103 | 1.35E-39 |
| rs4244173   | C | G | 0.73 | -0.1337 | 0.0102 | 1.38E-39 |
| rs4306162   | T | C | 0.74 | -0.1334 | 0.0101 | 1.53E-39 |
| rs4244176   | A | G | 0.74 | -0.1333 | 0.0101 | 1.56E-39 |
| rs4514268   | T | G | 0.28 | 0.1302  | 0.0099 | 1.59E-39 |
| rs7521689   | T | G | 0.74 | -0.1305 | 0.0099 | 1.76E-39 |
| rs4244174   | A | G | 0.26 | 0.1328  | 0.0101 | 1.78E-39 |
| rs7525344   | A | G | 0.26 | 0.1331  | 0.0101 | 1.83E-39 |
| rs7511706   | A | G | 0.74 | -0.1327 | 0.0101 | 1.88E-39 |
| rs10888353  | A | T | 0.28 | 0.1348  | 0.0103 | 1.90E-39 |
| rs4244177   | T | C | 0.74 | -0.1333 | 0.0101 | 1.96E-39 |
| rs4285735   | T | C | 0.67 | -0.1412 | 0.0107 | 1.98E-39 |
| rs4360555   | T | G | 0.74 | -0.1344 | 0.0102 | 1.98E-39 |
| rs10749648  | A | T | 0.30 | 0.1347  | 0.0103 | 2.08E-39 |
| rs7534188   | T | C | 0.27 | 0.129   | 0.0098 | 2.08E-39 |
| rs4244175   | A | G | 0.74 | -0.1333 | 0.0101 | 2.11E-39 |
| rs7527822   | T | C | 0.26 | 0.1322  | 0.0101 | 2.12E-39 |
| rs4453079   | A | T | 0.73 | -0.1353 | 0.0103 | 2.16E-39 |
| rs4578248   | A | G | 0.73 | -0.1291 | 0.0098 | 2.16E-39 |
| rs4298770   | A | G | 0.73 | -0.1289 | 0.0098 | 2.64E-39 |
| rs10888342  | A | G | 0.28 | 0.1294  | 0.0099 | 2.99E-39 |
| rs4916121   | T | C | 0.73 | -0.1288 | 0.0098 | 3.59E-39 |
| 1:248436616 | A | G | 0.33 | 0.1389  | 0.0106 | 3.59E-39 |
| rs4460676   | A | G | 0.73 | -0.1288 | 0.0098 | 3.61E-39 |
| rs4517383   | T | C | 0.73 | -0.1278 | 0.0098 | 3.70E-39 |
| rs4295906   | T | C | 0.73 | -0.1278 | 0.0098 | 4.30E-39 |
| rs4916124   | T | C | 0.28 | 0.133   | 0.0102 | 4.80E-39 |
| 1:248436611 | A | G | 0.62 | -0.1483 | 0.0113 | 4.91E-39 |
| rs78811906  | A | C | 0.28 | 0.1278  | 0.0098 | 5.10E-39 |
| rs10749646  | T | C | 0.73 | -0.128  | 0.0098 | 5.42E-39 |
| rs12046632  | A | G | 0.21 | 0.1455  | 0.0111 | 5.60E-39 |
| rs7412034   | C | G | 0.72 | -0.1275 | 0.0098 | 6.64E-39 |
| rs10749647  | T | C | 0.68 | -0.1368 | 0.0105 | 9.99E-39 |
| rs7528645   | A | T | 0.72 | -0.1262 | 0.0097 | 1.05E-38 |
| rs10888337  | A | G | 0.72 | -0.1262 | 0.0097 | 1.12E-38 |
| rs6667171   | A | C | 0.73 | -0.131  | 0.0101 | 1.37E-38 |
| rs10788763  | A | T | 0.72 | -0.1259 | 0.0097 | 2.12E-38 |
| rs9662385   | T | C | 0.66 | -0.1433 | 0.0111 | 3.01E-38 |
| rs6674940   | A | G | 0.33 | 0.1403  | 0.0109 | 4.10E-38 |
| rs10159227  | C | G | 0.72 | -0.1307 | 0.0101 | 4.45E-38 |
| rs7515408   | T | C | 0.73 | -0.1265 | 0.0098 | 5.71E-38 |

|             |   |   |      |         |        |          |
|-------------|---|---|------|---------|--------|----------|
| rs6698503   | A | G | 0.74 | -0.1287 | 0.01   | 6.03E-38 |
| rs6695468   | A | G | 0.74 | -0.1278 | 0.0099 | 8.63E-38 |
| rs28399248  | T | G | 0.28 | 0.1428  | 0.0111 | 1.14E-37 |
| rs4466692   | C | G | 0.28 | 0.1227  | 0.0097 | 6.47E-37 |
| rs4526647   | C | G | 0.28 | 0.123   | 0.0097 | 6.56E-37 |
| rs6686045   | C | G | 0.72 | -0.1207 | 0.0096 | 5.92E-36 |
| rs6703399   | T | C | 0.27 | 0.1204  | 0.0096 | 5.96E-36 |
| rs79235483  | A | C | 0.31 | 0.123   | 0.0098 | 7.34E-36 |
| rs10749644  | A | C | 0.28 | 0.1143  | 0.0092 | 1.07E-35 |
| rs6587440   | A | G | 0.28 | 0.1142  | 0.0092 | 1.09E-35 |
| rs7555217   | T | G | 0.28 | 0.1198  | 0.0096 | 1.25E-35 |
| rs7546964   | A | G | 0.27 | 0.1145  | 0.0092 | 1.30E-35 |
| rs6700515   | A | G | 0.29 | 0.1188  | 0.0095 | 1.34E-35 |
| rs7414420   | T | G | 0.29 | 0.1512  | 0.0121 | 1.43E-35 |
| rs4526648   | A | T | 0.72 | -0.1192 | 0.0096 | 1.67E-35 |
| rs4382760   | T | G | 0.72 | -0.1194 | 0.0096 | 1.89E-35 |
| rs139259149 | T | C | 0.67 | -0.1252 | 0.0101 | 2.86E-35 |
| rs10788762  | T | C | 0.70 | -0.1236 | 0.01   | 3.97E-35 |
| rs7414419   | T | G | 0.29 | 0.1502  | 0.0122 | 4.55E-35 |
| rs141962587 | A | G | 0.32 | 0.1251  | 0.0101 | 6.18E-35 |
| rs4559544   | T | G | 0.27 | 0.1152  | 0.0093 | 6.50E-35 |
| rs140795021 | A | C | 0.66 | -0.1284 | 0.0104 | 8.82E-35 |
| rs4453078   | A | G | 0.72 | -0.1135 | 0.0093 | 2.40E-34 |
| rs6659585   | A | T | 0.69 | -0.1273 | 0.0104 | 2.52E-34 |
| rs10458557  | A | C | 0.44 | 0.1504  | 0.0124 | 7.81E-34 |
| rs4430368   | A | G | 0.24 | 0.1056  | 0.0097 | 1.46E-27 |
| rs11204613  | A | G | 0.71 | -0.0958 | 0.009  | 3.01E-26 |
| rs10888328  | A | G | 0.74 | -0.0966 | 0.0092 | 1.01E-25 |
| rs6695316   | C | G | 0.74 | -0.0966 | 0.0093 | 2.38E-25 |
| rs6697831   | T | C | 0.74 | -0.0965 | 0.0093 | 2.46E-25 |
| rs4916117   | C | G | 0.74 | -0.0962 | 0.0093 | 2.72E-25 |
| rs4916115   | T | G | 0.27 | 0.0952  | 0.0092 | 2.80E-25 |
| rs28795805  | A | T | 0.49 | 0.1706  | 0.0164 | 2.91E-25 |
| rs9662722   | T | G | 0.26 | 0.0961  | 0.0093 | 2.92E-25 |
| rs28749168  | A | G | 0.66 | -0.1404 | 0.0135 | 2.94E-25 |
| rs71538192  | A | G | 0.49 | 0.1715  | 0.0165 | 3.18E-25 |
| rs4390207   | T | C | 0.74 | -0.0963 | 0.0093 | 3.46E-25 |
| rs4474292   | A | G | 0.73 | -0.0952 | 0.0092 | 3.74E-25 |
| rs4309012   | T | C | 0.73 | -0.0949 | 0.0092 | 4.00E-25 |
| rs4347239   | A | G | 0.27 | 0.095   | 0.0092 | 4.43E-25 |
| rs6666148   | T | C | 0.73 | -0.095  | 0.0092 | 4.79E-25 |
| rs7349159   | T | C | 0.73 | -0.0945 | 0.0092 | 5.34E-25 |
| rs28819159  | T | G | 0.27 | 0.1245  | 0.0121 | 6.20E-25 |
| rs28883135  | C | G | 0.48 | 0.1681  | 0.0164 | 9.22E-25 |
| rs4537599   | A | G | 0.74 | -0.1182 | 0.0115 | 1.06E-24 |
| rs10888329  | T | C | 0.27 | 0.0945  | 0.0092 | 1.25E-24 |
| rs4412629   | T | G | 0.73 | -0.0953 | 0.0093 | 1.32E-24 |
| rs4397683   | T | C | 0.74 | -0.0951 | 0.0094 | 3.81E-24 |
| rs6672981   | A | G | 0.74 | -0.0949 | 0.0094 | 4.50E-24 |

|             |   |   |      |         |        |          |
|-------------|---|---|------|---------|--------|----------|
| rs28781382  | C | G | 0.33 | 0.1288  | 0.0128 | 6.04E-24 |
| rs28803252  | A | G | 0.68 | -0.1508 | 0.015  | 7.33E-24 |
| rs10788761  | T | C | 0.74 | -0.0944 | 0.0094 | 7.76E-24 |
| rs12757057  | A | T | 0.42 | 0.1489  | 0.0148 | 8.50E-24 |
| rs6694598   | A | G | 0.27 | 0.0933  | 0.0093 | 9.70E-24 |
| rs4428922   | T | C | 0.73 | -0.0932 | 0.0093 | 1.03E-23 |
| rs6689894   | T | C | 0.73 | -0.0928 | 0.0093 | 1.25E-23 |
| rs28787378  | T | C | 0.73 | -0.115  | 0.0115 | 1.47E-23 |
| rs10888330  | A | T | 0.27 | 0.0929  | 0.0093 | 1.51E-23 |
| rs4642918   | T | G | 0.73 | -0.0923 | 0.0092 | 1.62E-23 |
| rs28579823  | T | C | 0.74 | -0.1145 | 0.0115 | 1.62E-23 |
| rs28581861  | T | G | 0.27 | 0.1145  | 0.0115 | 1.63E-23 |
| rs1934544   | A | G | 0.73 | -0.1146 | 0.0115 | 1.63E-23 |
| rs1934543   | C | G | 0.27 | 0.1145  | 0.0115 | 1.66E-23 |
| rs1339989   | C | G | 0.26 | 0.1135  | 0.0114 | 1.71E-23 |
| rs1339991   | T | C | 0.74 | -0.1134 | 0.0114 | 1.75E-23 |
| rs28451623  | A | G | 0.74 | -0.1134 | 0.0114 | 1.75E-23 |
| rs1339990   | T | C | 0.26 | 0.1134  | 0.0114 | 1.75E-23 |
| rs1339992   | A | G | 0.74 | -0.1134 | 0.0114 | 1.75E-23 |
| rs28782809  | T | C | 0.65 | -0.1318 | 0.0133 | 3.30E-23 |
| rs28883970  | A | T | 0.61 | -0.1344 | 0.0136 | 3.88E-23 |
| rs150452781 | A | G | 0.47 | 0.1516  | 0.0154 | 6.97E-23 |
| rs6587439   | T | C | 0.75 | -0.0937 | 0.0095 | 8.01E-23 |
| rs4916113   | T | C | 0.75 | -0.0926 | 0.0094 | 9.16E-23 |
| rs4508045   | A | G | 0.75 | -0.0938 | 0.0096 | 9.62E-23 |
| rs6691024   | A | G | 0.25 | 0.0928  | 0.0095 | 1.06E-22 |
| rs146140038 | A | T | 0.43 | 0.1518  | 0.0155 | 1.18E-22 |
| rs7521717   | A | T | 0.75 | -0.094  | 0.0096 | 1.18E-22 |
| rs4328104   | A | G | 0.25 | 0.0936  | 0.0096 | 1.22E-22 |
| rs192799404 | T | C | 0.54 | 0.178   | 0.0182 | 1.33E-22 |
| rs4916082   | T | C | 0.75 | -0.0937 | 0.0096 | 1.74E-22 |
| rs4453077   | T | C | 0.75 | -0.0946 | 0.0097 | 1.84E-22 |
| rs7533755   | A | G | 0.25 | 0.0936  | 0.0096 | 2.41E-22 |
| rs6587431   | T | C | 0.25 | 0.0936  | 0.0096 | 2.47E-22 |
| rs7529247   | T | C | 0.75 | -0.0935 | 0.0096 | 2.47E-22 |
| rs4576682   | A | T | 0.25 | 0.0935  | 0.0096 | 2.51E-22 |
| rs4390205   | A | C | 0.75 | -0.0935 | 0.0096 | 2.51E-22 |
| rs7548525   | A | G | 0.25 | 0.0935  | 0.0096 | 2.55E-22 |
| rs183802903 | A | G | 0.52 | -0.1487 | 0.0153 | 2.56E-22 |
| rs4271247   | T | C | 0.25 | 0.0936  | 0.0096 | 2.62E-22 |
| rs4546956   | A | G | 0.75 | -0.0934 | 0.0096 | 2.72E-22 |
| rs7529953   | A | T | 0.75 | -0.0934 | 0.0096 | 2.78E-22 |
| rs7522945   | A | C | 0.75 | -0.0934 | 0.0096 | 2.79E-22 |
| rs11204607  | A | G | 0.75 | -0.0934 | 0.0096 | 2.79E-22 |
| rs7544149   | T | C | 0.75 | -0.0942 | 0.0097 | 2.80E-22 |
| rs6587434   | A | G | 0.75 | -0.0936 | 0.0096 | 2.80E-22 |
| rs6587437   | T | G | 0.25 | 0.0934  | 0.0096 | 2.80E-22 |
| rs6587438   | C | G | 0.75 | -0.0934 | 0.0096 | 2.81E-22 |
| rs6587433   | A | G | 0.75 | -0.0934 | 0.0096 | 2.83E-22 |

|             |   |   |      |         |        |          |
|-------------|---|---|------|---------|--------|----------|
| rs12025218  | A | G | 0.25 | 0.0934  | 0.0096 | 2.84E-22 |
| rs11204611  | T | C | 0.25 | 0.0933  | 0.0096 | 2.84E-22 |
| rs12117067  | A | G | 0.25 | 0.0933  | 0.0096 | 2.85E-22 |
| rs7541625   | C | G | 0.75 | -0.0933 | 0.0096 | 2.89E-22 |
| rs7512756   | T | C | 0.25 | 0.0933  | 0.0096 | 2.90E-22 |
| rs7550630   | T | C | 0.75 | -0.0933 | 0.0096 | 2.90E-22 |
| rs11204610  | T | C | 0.75 | -0.0933 | 0.0096 | 2.91E-22 |
| rs6587432   | T | C | 0.75 | -0.0935 | 0.0096 | 2.92E-22 |
| rs4916107   | A | G | 0.75 | -0.0933 | 0.0096 | 3.07E-22 |
| rs140803038 | C | G | 0.46 | 0.1462  | 0.0151 | 3.21E-22 |
| rs10888323  | T | C | 0.75 | -0.0932 | 0.0096 | 3.26E-22 |
| rs4916109   | A | G | 0.75 | -0.0932 | 0.0096 | 3.27E-22 |
| rs11204608  | T | C | 0.75 | -0.0932 | 0.0096 | 3.28E-22 |
| rs4916108   | A | G | 0.75 | -0.0932 | 0.0096 | 3.28E-22 |
| rs10888324  | A | G | 0.75 | -0.0932 | 0.0096 | 3.83E-22 |
| rs4916110   | T | C | 0.25 | 0.0931  | 0.0096 | 4.37E-22 |
| rs7530153   | T | C | 0.28 | 0.0959  | 0.01   | 6.84E-22 |
| rs6587430   | T | G | 0.28 | 0.0976  | 0.0102 | 1.06E-21 |
| rs7516704   | A | T | 0.72 | -0.0967 | 0.0101 | 1.17E-21 |
| rs6587436   | A | G | 0.28 | 0.0955  | 0.01   | 1.17E-21 |
| rs7518603   | A | T | 0.25 | 0.0927  | 0.0097 | 1.34E-21 |
| rs10788783  | A | C | 0.58 | -0.0819 | 0.0086 | 2.01E-21 |
| rs4364913   | A | C | 0.69 | -0.1056 | 0.0111 | 2.57E-21 |
| rs4916106   | A | G | 0.75 | -0.0911 | 0.0096 | 2.58E-21 |
| rs6677282   | A | T | 0.58 | -0.0854 | 0.009  | 3.25E-21 |
| rs4415607   | T | C | 0.42 | 0.0836  | 0.0089 | 4.70E-21 |
| rs4415610   | T | C | 0.56 | -0.0825 | 0.0088 | 4.72E-21 |
| rs11204639  | T | C | 0.58 | -0.0836 | 0.0089 | 4.72E-21 |
| rs4589144   | T | C | 0.42 | 0.0839  | 0.0089 | 5.79E-21 |
| rs4477316   | T | C | 0.42 | 0.0841  | 0.009  | 6.68E-21 |
| rs28857255  | T | C | 0.49 | 0.1     | 0.0107 | 6.95E-21 |
| rs11485478  | T | C | 0.22 | 0.1509  | 0.0161 | 8.80E-21 |
| rs28590733  | T | C | 0.32 | 0.1029  | 0.0111 | 1.49E-20 |
| rs10888367  | A | G | 0.42 | 0.0846  | 0.0091 | 1.52E-20 |
| rs28680862  | T | C | 0.32 | 0.1024  | 0.0111 | 1.97E-20 |
| rs4639798   | A | G | 0.32 | 0.1023  | 0.011  | 2.03E-20 |
| rs6665904   | T | C | 0.47 | 0.0939  | 0.0102 | 2.29E-20 |
| rs1538703   | T | G | 0.31 | 0.1019  | 0.011  | 2.73E-20 |
| rs10888371  | T | G | 0.58 | -0.0848 | 0.0092 | 2.74E-20 |
| rs28706835  | A | G | 0.31 | 0.1028  | 0.0111 | 2.86E-20 |
| rs11204641  | A | G | 0.41 | 0.0858  | 0.0093 | 3.13E-20 |
| rs28572435  | A | G | 0.44 | 0.1304  | 0.0142 | 3.17E-20 |
| rs6665424   | T | G | 0.42 | 0.0856  | 0.0093 | 3.23E-20 |
| rs28607212  | T | C | 0.31 | 0.1018  | 0.0111 | 3.34E-20 |
| rs6657694   | T | C | 0.58 | -0.0858 | 0.0093 | 3.37E-20 |
| rs10888368  | T | C | 0.56 | -0.0846 | 0.0092 | 3.74E-20 |
| rs10749656  | T | C | 0.58 | -0.0843 | 0.0092 | 4.17E-20 |
| rs6680993   | T | C | 0.42 | 0.0842  | 0.0092 | 4.39E-20 |
| rs28565101  | T | C | 0.69 | -0.1015 | 0.0111 | 6.94E-20 |



|             |   |   |      |         |        |          |
|-------------|---|---|------|---------|--------|----------|
| rs11204642  | A | G | 0.57 | -0.0862 | 0.0094 | 6.97E-20 |
| rs28444488  | A | C | 0.70 | -0.1004 | 0.011  | 8.49E-20 |
| rs28616194  | A | T | 0.70 | -0.1004 | 0.011  | 8.50E-20 |
| rs6587458   | A | T | 0.70 | -0.1004 | 0.011  | 8.50E-20 |
| rs6688853   | A | G | 0.69 | -0.1007 | 0.0111 | 8.58E-20 |
| rs6682953   | T | C | 0.30 | 0.1004  | 0.011  | 8.66E-20 |
| rs6682957   | T | G | 0.30 | 0.1004  | 0.011  | 8.67E-20 |
| rs6587462   | A | G | 0.30 | 0.1005  | 0.011  | 8.91E-20 |
| rs6674078   | A | G | 0.70 | -0.1007 | 0.0111 | 9.11E-20 |
| rs6696691   | T | C | 0.30 | 0.1004  | 0.011  | 9.30E-20 |
| rs6681758   | A | T | 0.70 | -0.1004 | 0.011  | 9.36E-20 |
| rs7540715   | T | C | 0.70 | -0.1006 | 0.0111 | 9.57E-20 |
| rs6587463   | C | G | 0.70 | -0.1006 | 0.0111 | 9.63E-20 |
| rs6421453   | A | G | 0.31 | 0.1012  | 0.0111 | 9.69E-20 |
| rs1361413   | C | G | 0.30 | 0.0999  | 0.011  | 1.25E-19 |
| rs6691314   | A | G | 0.69 | -0.0995 | 0.011  | 1.41E-19 |
| rs7519867   | T | C | 0.50 | -0.0854 | 0.0095 | 1.72E-19 |
| rs11488133  | T | C | 0.31 | 0.0992  | 0.011  | 1.79E-19 |
| rs28546934  | A | G | 0.30 | 0.1     | 0.0111 | 1.82E-19 |
| rs946761    | T | C | 0.30 | 0.0993  | 0.011  | 1.87E-19 |
| rs11488132  | A | G | 0.19 | 0.1208  | 0.0134 | 2.14E-19 |
| rs946764    | A | C | 0.30 | 0.0989  | 0.011  | 2.18E-19 |
| rs28719164  | T | G | 0.32 | 0.0999  | 0.0111 | 2.40E-19 |
| rs1538704   | A | G | 0.70 | -0.0983 | 0.011  | 3.49E-19 |
| rs12749362  | A | G | 0.51 | -0.0837 | 0.0094 | 3.81E-19 |
| rs1544177   | C | G | 0.30 | 0.0982  | 0.011  | 3.92E-19 |
| rs7524978   | A | T | 0.30 | 0.0981  | 0.011  | 4.31E-19 |
| rs7520659   | A | C | 0.70 | -0.0981 | 0.011  | 4.37E-19 |
| rs7527991   | A | T | 0.70 | -0.098  | 0.011  | 4.39E-19 |
| rs7511986   | A | G | 0.70 | -0.098  | 0.011  | 4.41E-19 |
| rs28421649  | C | G | 0.68 | -0.0983 | 0.011  | 4.64E-19 |
| rs141353932 | A | G | 0.41 | -0.1598 | 0.0179 | 5.08E-19 |
| rs55741505  | A | G | 0.69 | -0.0989 | 0.0111 | 5.76E-19 |
| rs7417519   | A | G | 0.30 | 0.0974  | 0.011  | 6.32E-19 |
| rs6587467   | T | G | 0.31 | 0.0974  | 0.011  | 6.53E-19 |
| rs4360554   | T | C | 0.69 | -0.0973 | 0.011  | 7.52E-19 |
| rs28818253  | A | G | 0.46 | -0.0951 | 0.0107 | 7.82E-19 |
| rs28684663  | T | C | 0.31 | 0.0972  | 0.011  | 8.00E-19 |
| rs11204634  | C | G | 0.48 | 0.078   | 0.0088 | 9.73E-19 |
| rs6587471   | A | G | 0.69 | -0.0968 | 0.011  | 1.02E-18 |
| rs4297336   | A | G | 0.52 | -0.081  | 0.0092 | 1.24E-18 |
| rs28869306  | C | G | 0.41 | 0.1104  | 0.0126 | 1.66E-18 |
| rs4916129   | T | C | 0.50 | -0.0802 | 0.0091 | 1.70E-18 |
| rs138556316 | A | G | 0.69 | -0.0965 | 0.011  | 1.71E-18 |
| rs28468416  | T | G | 0.69 | -0.0971 | 0.0111 | 2.09E-18 |
| rs4559542   | T | C | 0.53 | -0.0762 | 0.0087 | 2.16E-18 |
| rs28858103  | T | G | 0.51 | -0.0849 | 0.0097 | 2.30E-18 |
| rs28763387  | T | C | 0.30 | 0.0956  | 0.011  | 2.96E-18 |
| rs11488135  | A | G | 0.69 | -0.0966 | 0.0111 | 4.36E-18 |

|             |   |   |      |         |        |          |
|-------------|---|---|------|---------|--------|----------|
| rs28729425  | T | C | 0.30 | 0.0956  | 0.0111 | 5.72E-18 |
| rs28589987  | T | C | 0.31 | 0.0955  | 0.0111 | 6.79E-18 |
| rs34542972  | T | C | 0.52 | -0.0816 | 0.0095 | 6.96E-18 |
| rs75349579  | A | C | 0.37 | 0.1038  | 0.0121 | 7.92E-18 |
| rs141135906 | T | C | 0.52 | -0.0829 | 0.0097 | 9.52E-18 |
| rs11485458  | A | G | 0.31 | 0.0954  | 0.0111 | 1.12E-17 |
| rs7411614   | T | C | 0.47 | 0.0759  | 0.0092 | 1.26E-16 |
| rs28769405  | A | G | 0.24 | 0.1671  | 0.0203 | 2.10E-16 |
| rs1538702   | A | T | 0.41 | 0.0926  | 0.0113 | 2.62E-16 |
| rs10888339  | T | C | 0.46 | 0.075   | 0.0092 | 3.64E-16 |
| rs11204620  | T | C | 0.46 | 0.0741  | 0.0091 | 3.90E-16 |
| rs10788764  | A | G | 0.47 | 0.0744  | 0.0092 | 6.01E-16 |
| rs12034050  | T | C | 0.50 | -0.0796 | 0.0099 | 6.80E-16 |
| rs6695780   | A | G | 0.79 | -0.1056 | 0.0132 | 1.14E-15 |
| rs6656862   | T | C | 0.45 | 0.0722  | 0.0091 | 2.16E-15 |
| rs75983624  | T | C | 0.07 | 0.2533  | 0.032  | 2.37E-15 |
| rs12723512  | A | G | 0.48 | 0.0736  | 0.0093 | 2.41E-15 |
| 1:248458571 | A | T | 0.52 | -0.0729 | 0.0093 | 4.09E-15 |
| rs77795510  | T | C | 0.62 | 0.132   | 0.0169 | 5.99E-15 |
| rs28642279  | C | G | 0.21 | 0.0961  | 0.013  | 1.39E-13 |
| rs56162116  | A | G | 0.38 | -0.1183 | 0.0162 | 3.11E-13 |
| rs28515652  | A | G | 0.63 | -0.1107 | 0.0154 | 5.97E-13 |
| rs28813072  | A | G | 0.48 | -0.092  | 0.0129 | 9.54E-13 |
| rs7414182   | A | G | 0.58 | -0.0745 | 0.0104 | 9.58E-13 |
| rs111453957 | A | G | 0.92 | -0.1282 | 0.0181 | 1.36E-12 |
| rs6657960   | A | G | 0.52 | -0.0797 | 0.0113 | 1.44E-12 |
| rs6668460   | C | G | 0.46 | 0.0793  | 0.0112 | 1.70E-12 |
| rs28571812  | C | G | 0.52 | -0.0792 | 0.0113 | 2.06E-12 |
| rs28465434  | C | G | 0.48 | 0.0789  | 0.0112 | 2.06E-12 |
| rs6662468   | A | G | 0.55 | 0.0925  | 0.0132 | 2.15E-12 |
| rs6667849   | T | C | 0.55 | -0.0753 | 0.0107 | 2.17E-12 |
| rs6667858   | T | C | 0.56 | -0.0747 | 0.0106 | 2.32E-12 |
| rs1538710   | T | G | 0.43 | 0.0726  | 0.0104 | 2.49E-12 |
| rs28769991  | T | C | 0.44 | 0.0721  | 0.0103 | 2.86E-12 |
| rs4354569   | A | G | 0.57 | -0.0724 | 0.0104 | 2.89E-12 |
| rs28576448  | T | C | 0.56 | -0.0716 | 0.0103 | 3.14E-12 |
| rs28790302  | A | G | 0.44 | 0.0721  | 0.0103 | 3.22E-12 |
| rs3949391   | A | G | 0.43 | 0.0722  | 0.0104 | 3.26E-12 |
| rs28873533  | T | G | 0.44 | 0.0718  | 0.0103 | 3.30E-12 |
| rs1934545   | A | G | 0.56 | -0.0717 | 0.0103 | 3.31E-12 |
| rs28754930  | A | T | 0.44 | 0.0717  | 0.0103 | 3.32E-12 |
| rs28816758  | T | C | 0.55 | -0.0727 | 0.0104 | 3.36E-12 |
| rs4916131   | A | G | 0.44 | 0.0716  | 0.0103 | 3.36E-12 |
| rs28631494  | A | C | 0.43 | 0.0719  | 0.0103 | 3.37E-12 |
| rs28431379  | A | T | 0.45 | 0.0723  | 0.0104 | 3.38E-12 |
| rs28704053  | C | G | 0.44 | 0.072   | 0.0103 | 3.41E-12 |
| rs28469841  | T | C | 0.43 | 0.071   | 0.0102 | 3.43E-12 |
| rs28607995  | A | G | 0.57 | -0.0717 | 0.0103 | 3.47E-12 |
| rs4576685   | T | G | 0.56 | -0.0711 | 0.0102 | 3.48E-12 |

|            |   |   |      |         |        |          |
|------------|---|---|------|---------|--------|----------|
| rs4336886  | T | C | 0.44 | 0.0711  | 0.0102 | 3.48E-12 |
| rs28396562 | T | C | 0.44 | 0.0717  | 0.0103 | 3.51E-12 |
| rs28712553 | C | G | 0.57 | -0.0718 | 0.0103 | 3.51E-12 |
| rs28728105 | T | C | 0.57 | -0.0711 | 0.0102 | 3.53E-12 |
| rs28545014 | T | G | 0.57 | -0.0717 | 0.0103 | 3.53E-12 |
| rs28377739 | A | G | 0.57 | -0.0717 | 0.0103 | 3.54E-12 |
| rs28372410 | T | G | 0.43 | 0.0711  | 0.0102 | 3.54E-12 |
| rs28419186 | T | G | 0.57 | -0.0711 | 0.0102 | 3.54E-12 |
| rs28657383 | A | T | 0.43 | 0.0717  | 0.0103 | 3.55E-12 |
| rs28481429 | C | G | 0.57 | -0.0717 | 0.0103 | 3.55E-12 |
| rs28609049 | T | C | 0.43 | 0.0717  | 0.0103 | 3.55E-12 |
| rs2039824  | T | C | 0.57 | -0.0717 | 0.0103 | 3.55E-12 |
| rs28680702 | A | G | 0.57 | -0.0717 | 0.0103 | 3.57E-12 |
| rs1339988  | A | G | 0.57 | -0.0708 | 0.0102 | 3.64E-12 |
| rs28430581 | A | T | 0.56 | -0.0713 | 0.0103 | 3.68E-12 |
| rs28693517 | T | C | 0.56 | -0.0723 | 0.0104 | 4.04E-12 |
| rs28539363 | A | C | 0.56 | -0.0723 | 0.0104 | 4.07E-12 |
| rs28589611 | A | G | 0.44 | 0.0723  | 0.0104 | 4.09E-12 |
| rs12354081 | A | G | 0.55 | -0.061  | 0.0088 | 4.76E-12 |
| rs4509607  | A | C | 0.55 | -0.0609 | 0.0088 | 5.32E-12 |
| rs11204614 | A | C | 0.55 | -0.061  | 0.0089 | 5.82E-12 |
| rs6660381  | T | C | 0.61 | -0.0594 | 0.0086 | 6.29E-12 |
| rs56344892 | A | G | 0.63 | 0.1087  | 0.0158 | 6.41E-12 |
| rs71538193 | A | G | 0.37 | -0.1088 | 0.0159 | 6.99E-12 |
| rs10888322 | A | G | 0.61 | -0.0591 | 0.0086 | 7.42E-12 |
| rs7522840  | C | G | 0.39 | 0.0591  | 0.0086 | 7.76E-12 |
| rs61832942 | A | C | 0.30 | -0.1366 | 0.0201 | 1.00E-11 |
| rs10888375 | A | G | 0.29 | -0.1356 | 0.02   | 1.09E-11 |
| rs12133646 | A | G | 0.51 | -0.0646 | 0.0095 | 1.09E-11 |
| rs11204612 | A | G | 0.40 | 0.06    | 0.0088 | 1.10E-11 |
| rs7514239  | T | C | 0.60 | -0.0597 | 0.0088 | 1.30E-11 |
| rs3927687  | T | C | 0.48 | 0.0696  | 0.0103 | 1.32E-11 |
| rs4626922  | T | C | 0.42 | 0.0607  | 0.009  | 1.45E-11 |
| rs4494168  | T | C | 0.58 | -0.0607 | 0.009  | 1.45E-11 |
| rs7516127  | A | G | 0.48 | 0.0693  | 0.0103 | 1.58E-11 |
| rs7513570  | A | G | 0.45 | 0.0688  | 0.0102 | 1.58E-11 |
| rs28701914 | T | C | 0.48 | 0.0688  | 0.0103 | 1.95E-11 |
| rs35489390 | T | G | 0.52 | -0.0688 | 0.0103 | 1.96E-11 |
| rs12063997 | A | C | 0.39 | 0.0587  | 0.0088 | 2.02E-11 |
| rs6688371  | C | G | 0.51 | -0.0691 | 0.0103 | 2.03E-11 |
| rs34850199 | A | G | 0.51 | -0.069  | 0.0103 | 2.07E-11 |
| rs1538701  | A | G | 0.52 | -0.0687 | 0.0103 | 2.09E-11 |
| rs28574687 | T | G | 0.49 | 0.0691  | 0.0103 | 2.10E-11 |
| rs61832889 | A | G | 0.39 | -0.1013 | 0.0151 | 2.12E-11 |
| rs4326658  | A | C | 0.60 | -0.0579 | 0.0087 | 2.17E-11 |
| rs6702640  | A | G | 0.49 | 0.0689  | 0.0103 | 2.21E-11 |
| rs6697835  | T | C | 0.51 | -0.0689 | 0.0103 | 2.22E-11 |
| rs6702777  | A | G | 0.49 | 0.0687  | 0.0103 | 2.24E-11 |
| rs28547518 | T | G | 0.47 | 0.0685  | 0.0102 | 2.24E-11 |

|            |   |   |      |         |        |          |
|------------|---|---|------|---------|--------|----------|
| rs28496519 | A | C | 0.46 | 0.0687  | 0.0103 | 2.26E-11 |
| rs6702450  | A | G | 0.49 | 0.0687  | 0.0103 | 2.27E-11 |
| rs6688663  | T | G | 0.51 | -0.0688 | 0.0103 | 2.29E-11 |
| rs6698060  | T | C | 0.51 | -0.0691 | 0.0103 | 2.29E-11 |
| rs28692768 | A | G | 0.52 | -0.069  | 0.0103 | 2.31E-11 |
| rs28683073 | A | C | 0.54 | -0.0687 | 0.0103 | 2.35E-11 |
| rs28590551 | A | G | 0.49 | 0.0687  | 0.0103 | 2.40E-11 |
| rs7544362  | A | G | 0.50 | -0.0728 | 0.0109 | 2.40E-11 |
| rs6673454  | A | G | 0.06 | 0.1629  | 0.0244 | 2.41E-11 |
| rs11488124 | A | C | 0.59 | -0.059  | 0.0088 | 2.41E-11 |
| rs1934542  | T | C | 0.49 | 0.0689  | 0.0103 | 2.42E-11 |
| rs35274032 | A | G | 0.48 | 0.0689  | 0.0103 | 2.42E-11 |
| rs28708457 | T | C | 0.51 | -0.0687 | 0.0103 | 2.43E-11 |
| rs34389617 | T | G | 0.51 | -0.0689 | 0.0103 | 2.44E-11 |
| rs1544176  | A | G | 0.54 | -0.068  | 0.0102 | 2.45E-11 |
| rs7515376  | T | C | 0.50 | 0.0728  | 0.0109 | 2.47E-11 |
| rs1538709  | T | C | 0.51 | -0.0688 | 0.0103 | 2.48E-11 |
| rs1934541  | T | C | 0.49 | 0.0687  | 0.0103 | 2.51E-11 |
| rs28819183 | T | C | 0.45 | 0.0772  | 0.0116 | 2.52E-11 |
| rs4366353  | T | C | 0.51 | -0.0691 | 0.0104 | 2.52E-11 |
| rs1544175  | A | G | 0.54 | -0.0682 | 0.0102 | 2.54E-11 |
| rs28582047 | A | G | 0.51 | -0.0691 | 0.0104 | 2.57E-11 |
| rs28408294 | T | G | 0.46 | 0.0679  | 0.0102 | 2.58E-11 |
| rs28545558 | A | G | 0.54 | -0.0678 | 0.0102 | 2.58E-11 |
| rs28583925 | A | G | 0.49 | 0.0688  | 0.0103 | 2.60E-11 |
| rs4916111  | A | G | 0.40 | 0.0581  | 0.0087 | 2.60E-11 |
| rs7520424  | T | C | 0.54 | -0.0679 | 0.0102 | 2.61E-11 |
| rs4916112  | A | G | 0.60 | -0.0582 | 0.0087 | 2.63E-11 |
| rs28525318 | A | G | 0.51 | -0.0686 | 0.0103 | 2.69E-11 |
| rs10888325 | A | G | 0.40 | 0.0579  | 0.0087 | 2.74E-11 |
| rs6587460  | T | C | 0.45 | 0.068   | 0.0102 | 2.84E-11 |
| rs12022706 | T | C | 0.58 | -0.0594 | 0.0089 | 2.93E-11 |
| rs7550643  | T | C | 0.60 | -0.0578 | 0.0087 | 2.99E-11 |
| rs28627313 | T | C | 0.45 | 0.068   | 0.0102 | 3.04E-11 |
| rs7523228  | C | G | 0.45 | 0.068   | 0.0102 | 3.09E-11 |
| rs6587457  | A | G | 0.55 | -0.0676 | 0.0102 | 3.10E-11 |
| rs6696565  | A | G | 0.55 | -0.0677 | 0.0102 | 3.12E-11 |
| rs4412631  | T | G | 0.61 | -0.0568 | 0.0086 | 3.14E-11 |
| rs4412630  | T | G | 0.61 | -0.0568 | 0.0086 | 3.15E-11 |
| rs12022705 | T | C | 0.58 | -0.0595 | 0.009  | 3.23E-11 |
| rs61832688 | T | G | 0.59 | -0.0586 | 0.0088 | 3.35E-11 |
| rs1339987  | T | C | 0.55 | -0.0676 | 0.0102 | 3.60E-11 |
| rs6678999  | A | G | 0.45 | 0.0677  | 0.0102 | 3.60E-11 |
| rs28555620 | T | C | 0.54 | -0.0676 | 0.0102 | 3.72E-11 |
| rs28514998 | T | G | 0.46 | 0.0676  | 0.0102 | 3.74E-11 |
| rs28738670 | T | C | 0.54 | -0.0676 | 0.0102 | 3.76E-11 |
| rs10788757 | A | G | 0.61 | -0.0563 | 0.0085 | 3.93E-11 |
| rs12088869 | C | G | 0.61 | -0.0562 | 0.0085 | 4.10E-11 |
| rs28523425 | A | T | 0.44 | 0.0697  | 0.0106 | 4.88E-11 |

|             |   |   |      |         |        |          |
|-------------|---|---|------|---------|--------|----------|
| rs28729893  | A | G | 0.45 | 0.0674  | 0.0102 | 4.97E-11 |
| rs11204598  | A | T | 0.40 | 0.056   | 0.0085 | 5.08E-11 |
| rs12049453  | T | C | 0.60 | -0.0561 | 0.0085 | 5.19E-11 |
| rs7520734   | T | C | 0.36 | 0.0562  | 0.0086 | 5.40E-11 |
| rs28390128  | A | G | 0.49 | 0.0686  | 0.0105 | 5.40E-11 |
| rs4615870   | T | C | 0.64 | -0.0562 | 0.0086 | 5.42E-11 |
| rs884544    | T | C | 0.53 | -0.0668 | 0.0102 | 5.46E-11 |
| rs946762    | T | C | 0.47 | 0.0668  | 0.0102 | 5.59E-11 |
| rs4475789   | T | G | 0.36 | 0.0562  | 0.0086 | 6.16E-11 |
| rs7515550   | A | G | 0.35 | 0.056   | 0.0086 | 6.20E-11 |
| rs147267541 | T | C | 0.08 | 0.1265  | 0.0194 | 6.55E-11 |
| rs2153388   | T | C | 0.48 | 0.066   | 0.0101 | 7.25E-11 |
| rs12022610  | T | C | 0.60 | -0.0566 | 0.0087 | 7.33E-11 |
| rs946766    | T | C | 0.52 | -0.066  | 0.0101 | 7.52E-11 |
| rs946767    | A | T | 0.48 | 0.0659  | 0.0101 | 7.69E-11 |
| rs28719833  | A | T | 0.52 | -0.0658 | 0.0101 | 7.78E-11 |
| rs946765    | T | C | 0.52 | -0.066  | 0.0102 | 7.85E-11 |
| rs946763    | A | G | 0.48 | 0.066   | 0.0101 | 7.88E-11 |
| rs1556967   | T | C | 0.52 | -0.0658 | 0.0101 | 8.04E-11 |
| rs1339986   | A | G | 0.54 | -0.0663 | 0.0102 | 8.40E-11 |
| rs28893010  | A | T | 0.54 | -0.0666 | 0.0103 | 8.42E-11 |
| rs7364694   | A | G | 0.24 | 0.1038  | 0.016  | 8.57E-11 |
| rs10888320  | A | T | 0.36 | 0.0565  | 0.0087 | 9.25E-11 |
| rs28523915  | A | G | 0.46 | 0.0669  | 0.0104 | 1.07E-10 |
| rs7551888   | T | C | 0.64 | -0.0554 | 0.0086 | 1.14E-10 |
| rs10888318  | C | G | 0.64 | -0.0552 | 0.0086 | 1.17E-10 |
| rs9435920   | T | C | 0.36 | 0.0553  | 0.0086 | 1.26E-10 |
| rs28503806  | A | G | 0.67 | -0.1172 | 0.0182 | 1.29E-10 |
| rs28599722  | A | G | 0.45 | 0.0679  | 0.0106 | 1.31E-10 |
| rs6587429   | A | T | 0.64 | -0.0551 | 0.0086 | 1.31E-10 |
| rs4916181   | A | G | 0.90 | -0.1341 | 0.0209 | 1.32E-10 |
| rs11204604  | A | G | 0.64 | -0.0567 | 0.0088 | 1.45E-10 |
| rs12048030  | A | G | 0.55 | -0.0604 | 0.0094 | 1.46E-10 |
| rs12024915  | T | C | 0.45 | 0.0603  | 0.0094 | 1.46E-10 |
| rs28404051  | A | T | 0.23 | 0.1015  | 0.0159 | 1.59E-10 |
| rs11485460  | A | G | 0.25 | 0.1045  | 0.0163 | 1.60E-10 |
| rs11204605  | A | G | 0.55 | -0.0598 | 0.0094 | 1.84E-10 |
| rs2185358   | A | T | 0.78 | -0.0916 | 0.0144 | 1.89E-10 |
| rs12044201  | A | G | 0.64 | -0.0552 | 0.0087 | 1.91E-10 |
| rs4417104   | T | C | 0.58 | -0.057  | 0.009  | 1.92E-10 |
| rs2095952   | A | G | 0.24 | 0.091   | 0.0143 | 1.98E-10 |
| rs4504921   | T | C | 0.23 | 0.0889  | 0.014  | 2.02E-10 |
| rs4475788   | A | G | 0.36 | 0.0544  | 0.0086 | 2.05E-10 |
| rs4309011   | A | C | 0.36 | 0.0544  | 0.0086 | 2.07E-10 |
| rs10788759  | A | G | 0.36 | 0.0542  | 0.0085 | 2.11E-10 |
| rs10788758  | A | G | 0.64 | -0.0542 | 0.0085 | 2.12E-10 |
| rs113871675 | A | G | 0.93 | -0.1208 | 0.0191 | 2.40E-10 |
| rs4309010   | A | G | 0.64 | -0.0542 | 0.0086 | 2.40E-10 |
| rs28534600  | A | T | 0.54 | -0.0655 | 0.0104 | 2.45E-10 |

|             |   |   |      |         |        |          |
|-------------|---|---|------|---------|--------|----------|
| rs10888316  | A | C | 0.36 | 0.0544  | 0.0086 | 2.46E-10 |
| rs10888319  | C | G | 0.36 | 0.054   | 0.0085 | 2.66E-10 |
| rs4244171   | C | G | 0.42 | 0.0589  | 0.0093 | 2.71E-10 |
| rs6700218   | T | C | 0.36 | 0.0539  | 0.0085 | 2.76E-10 |
| rs6692295   | T | C | 0.64 | -0.0539 | 0.0085 | 2.78E-10 |
| rs6692096   | C | G | 0.36 | 0.0539  | 0.0085 | 2.82E-10 |
| rs12094919  | A | G | 0.36 | 0.0539  | 0.0085 | 2.83E-10 |
| rs7518270   | T | C | 0.36 | 0.0538  | 0.0085 | 2.84E-10 |
| rs7513567   | T | C | 0.64 | -0.0538 | 0.0085 | 2.88E-10 |
| rs7521431   | T | G | 0.36 | 0.0538  | 0.0085 | 3.02E-10 |
| rs116660969 | T | G | 0.05 | 0.1228  | 0.0195 | 3.05E-10 |
| rs146005063 | C | G | 0.95 | -0.1228 | 0.0195 | 3.05E-10 |
| rs28444499  | A | C | 0.78 | -0.1045 | 0.0166 | 3.08E-10 |
| rs6697190   | A | G | 0.36 | 0.054   | 0.0086 | 3.09E-10 |
| rs28661952  | A | G | 0.46 | 0.065   | 0.0103 | 3.15E-10 |
| rs72763235  | T | G | 0.06 | 0.1187  | 0.0189 | 3.23E-10 |
| rs6587475   | T | C | 0.77 | -0.0759 | 0.0121 | 3.24E-10 |
| rs56965727  | A | G | 0.94 | -0.1212 | 0.0193 | 3.44E-10 |
| rs72763236  | T | C | 0.06 | 0.1171  | 0.0187 | 3.74E-10 |
| rs4436422   | T | G | 0.64 | -0.0535 | 0.0085 | 3.83E-10 |
| rs4592280   | A | G | 0.46 | 0.0648  | 0.0104 | 3.92E-10 |
| rs72763234  | C | G | 0.94 | -0.1163 | 0.0186 | 3.98E-10 |
| rs13373863  | A | G | 0.07 | 0.1165  | 0.0186 | 4.11E-10 |
| rs72763233  | A | G | 0.94 | -0.1155 | 0.0185 | 4.32E-10 |
| rs4571999   | A | C | 0.36 | 0.0533  | 0.0085 | 4.34E-10 |
| rs78865120  | A | G | 0.94 | -0.1211 | 0.0194 | 4.34E-10 |
| rs7417968   | T | C | 0.64 | -0.0533 | 0.0085 | 4.34E-10 |
| rs12756779  | A | T | 0.36 | 0.0533  | 0.0085 | 4.35E-10 |
| rs72763220  | C | G | 0.93 | -0.1238 | 0.0198 | 4.39E-10 |
| rs3001305   | T | C | 0.36 | 0.0533  | 0.0085 | 4.41E-10 |
| rs4430367   | A | G | 0.64 | -0.0533 | 0.0085 | 4.41E-10 |
| rs7549018   | C | G | 0.36 | 0.0533  | 0.0085 | 4.42E-10 |
| rs4430366   | A | G | 0.64 | -0.0533 | 0.0085 | 4.44E-10 |
| rs3010202   | C | G | 0.36 | 0.0533  | 0.0085 | 4.45E-10 |
| rs72763229  | T | C | 0.06 | 0.1178  | 0.0189 | 4.54E-10 |
| rs1538705   | A | T | 0.47 | 0.0644  | 0.0103 | 4.54E-10 |
| rs12733732  | T | C | 0.43 | 0.0553  | 0.0089 | 4.56E-10 |
| rs9435892   | A | T | 0.64 | -0.0532 | 0.0085 | 4.60E-10 |
| rs9435921   | T | G | 0.36 | 0.0532  | 0.0085 | 4.62E-10 |
| rs9435891   | T | C | 0.36 | 0.0533  | 0.0085 | 4.63E-10 |
| rs4916105   | T | C | 0.64 | -0.0533 | 0.0086 | 4.65E-10 |
| rs10788753  | A | T | 0.94 | -0.1145 | 0.0184 | 4.75E-10 |
| rs4628537   | T | C | 0.64 | -0.0532 | 0.0085 | 4.76E-10 |
| rs72763237  | A | G | 0.06 | 0.1164  | 0.0187 | 4.86E-10 |
| rs61832672  | T | G | 0.45 | 0.0616  | 0.0099 | 4.87E-10 |
| rs7512072   | T | C | 0.94 | -0.1146 | 0.0184 | 4.88E-10 |
| rs6657389   | T | G | 0.05 | 0.1175  | 0.0189 | 4.93E-10 |
| rs10888317  | A | G | 0.37 | 0.0532  | 0.0086 | 5.00E-10 |
| rs72763240  | A | G | 0.94 | -0.1168 | 0.0188 | 5.07E-10 |

|             |   |   |      |         |        |          |
|-------------|---|---|------|---------|--------|----------|
| rs7553421   | A | T | 0.36 | 0.0532  | 0.0086 | 5.16E-10 |
| rs72763239  | T | G | 0.94 | -0.1166 | 0.0188 | 5.18E-10 |
| rs79752829  | T | G | 0.94 | -0.1166 | 0.0188 | 5.50E-10 |
| rs4916104   | T | C | 0.42 | 0.0581  | 0.0094 | 5.69E-10 |
| rs28667896  | A | G | 0.46 | 0.0644  | 0.0104 | 5.80E-10 |
| rs72763243  | T | C | 0.06 | 0.1163  | 0.0188 | 5.97E-10 |
| rs6685509   | T | C | 0.05 | 0.1149  | 0.0186 | 6.22E-10 |
| rs10888312  | A | C | 0.06 | 0.1141  | 0.0184 | 6.24E-10 |
| rs7532628   | T | G | 0.05 | 0.1149  | 0.0186 | 6.29E-10 |
| rs4424545   | A | G | 0.64 | -0.0527 | 0.0085 | 6.31E-10 |
| rs72763230  | A | T | 0.94 | -0.1168 | 0.0189 | 6.51E-10 |
| rs6701653   | T | C | 0.95 | -0.1147 | 0.0186 | 6.53E-10 |
| rs6692201   | T | C | 0.05 | 0.1147  | 0.0186 | 6.55E-10 |
| rs11204600  | T | C | 0.36 | 0.0526  | 0.0085 | 6.65E-10 |
| rs4415609   | A | G | 0.36 | 0.0527  | 0.0085 | 6.69E-10 |
| rs4559543   | T | C | 0.64 | -0.0527 | 0.0085 | 6.72E-10 |
| rs5015666   | C | G | 0.95 | -0.1146 | 0.0186 | 6.72E-10 |
| rs72763224  | T | C | 0.06 | 0.1205  | 0.0195 | 6.77E-10 |
| rs5015664   | T | C | 0.05 | 0.1146  | 0.0186 | 6.78E-10 |
| rs5015668   | T | C | 0.95 | -0.1146 | 0.0186 | 6.81E-10 |
| rs115276215 | T | G | 0.05 | 0.1148  | 0.0186 | 6.82E-10 |
| rs11204601  | A | G | 0.36 | 0.0526  | 0.0085 | 6.82E-10 |
| rs4313428   | A | G | 0.05 | 0.1145  | 0.0186 | 6.85E-10 |
| rs5015665   | C | G | 0.05 | 0.1146  | 0.0186 | 6.90E-10 |
| rs10888315  | A | G | 0.64 | -0.0526 | 0.0085 | 6.90E-10 |
| rs11204602  | T | C | 0.36 | 0.0526  | 0.0085 | 7.10E-10 |
| rs12756781  | A | G | 0.37 | 0.0529  | 0.0086 | 7.20E-10 |
| rs6587420   | T | C | 0.05 | 0.1146  | 0.0186 | 7.24E-10 |
| rs7544991   | T | C | 0.95 | -0.1145 | 0.0186 | 7.25E-10 |
| rs12037329  | T | C | 0.05 | 0.114   | 0.0185 | 7.36E-10 |
| rs73145287  | T | C | 0.05 | 0.1142  | 0.0186 | 7.38E-10 |
| rs4916114   | A | G | 0.57 | -0.0543 | 0.0088 | 7.39E-10 |
| rs11204597  | T | G | 0.36 | 0.0572  | 0.0093 | 7.56E-10 |
| rs112229130 | A | G | 0.06 | 0.1202  | 0.0196 | 7.86E-10 |
| rs35675628  | T | C | 0.41 | 0.0687  | 0.0112 | 7.90E-10 |
| rs12034548  | A | T | 0.05 | 0.114   | 0.0186 | 8.13E-10 |
| rs12037761  | T | C | 0.95 | -0.1155 | 0.0188 | 8.57E-10 |
| rs72763222  | A | C | 0.06 | 0.1207  | 0.0197 | 8.61E-10 |
| rs12033551  | C | G | 0.05 | 0.114   | 0.0186 | 8.63E-10 |
| rs9435919   | T | C | 0.62 | -0.0545 | 0.0089 | 8.72E-10 |
| rs112526160 | T | C | 0.95 | -0.1157 | 0.0189 | 8.78E-10 |
| rs72763248  | T | C | 0.95 | -0.115  | 0.0188 | 8.81E-10 |
| rs12029827  | A | C | 0.05 | 0.1141  | 0.0186 | 8.87E-10 |
| rs6665846   | A | G | 0.95 | -0.1326 | 0.0216 | 8.89E-10 |
| rs4471301   | A | G | 0.95 | -0.1174 | 0.0192 | 8.89E-10 |
| rs111755774 | C | G | 0.05 | 0.1144  | 0.0187 | 8.91E-10 |
| rs144861534 | A | C | 0.05 | 0.1144  | 0.0187 | 8.91E-10 |
| rs6658256   | T | C | 0.12 | 0.0867  | 0.0141 | 8.97E-10 |
| rs140264447 | A | C | 0.05 | 0.1144  | 0.0187 | 9.14E-10 |

|             |   |   |      |         |        |          |
|-------------|---|---|------|---------|--------|----------|
| rs4636501   | C | G | 0.95 | -0.1143 | 0.0187 | 9.25E-10 |
| rs12028988  | A | G | 0.05 | 0.1142  | 0.0186 | 9.28E-10 |
| rs12028959  | T | G | 0.05 | 0.1141  | 0.0186 | 9.31E-10 |
| rs12036678  | T | C | 0.95 | -0.1143 | 0.0187 | 9.63E-10 |
| rs12034675  | A | G | 0.95 | -0.1143 | 0.0187 | 9.66E-10 |
| rs6682718   | T | C | 0.95 | -0.1142 | 0.0187 | 9.80E-10 |
| rs192107511 | A | T | 0.05 | 0.1141  | 0.0187 | 9.83E-10 |
| rs61216800  | A | G | 0.05 | 0.1142  | 0.0187 | 9.84E-10 |
| rs72763219  | C | G | 0.07 | 0.1236  | 0.0202 | 9.87E-10 |
| rs12033903  | T | G | 0.05 | 0.1142  | 0.0187 | 9.89E-10 |
| rs73129409  | T | C | 0.95 | -0.1142 | 0.0187 | 9.93E-10 |
| rs73145245  | T | G | 0.95 | -0.1157 | 0.0189 | 9.93E-10 |
| rs6682869   | C | G | 0.05 | 0.114   | 0.0187 | 9.94E-10 |
| rs140784417 | A | T | 0.95 | -0.1143 | 0.0187 | 9.95E-10 |
| rs73147262  | T | C | 0.05 | 0.114   | 0.0187 | 9.97E-10 |
| rs73147263  | A | T | 0.05 | 0.114   | 0.0187 | 9.97E-10 |
| rs147639902 | T | C | 0.05 | 0.114   | 0.0187 | 1.00E-09 |
| rs12038708  | A | G | 0.95 | -0.1141 | 0.0187 | 1.01E-09 |
| rs12022488  | T | G | 0.94 | -0.115  | 0.0188 | 1.01E-09 |
| rs6691972   | T | C | 0.05 | 0.114   | 0.0187 | 1.01E-09 |
| rs12032973  | A | G | 0.95 | -0.1138 | 0.0186 | 1.02E-09 |
| rs61273564  | A | G | 0.05 | 0.1138  | 0.0186 | 1.02E-09 |
| rs12035965  | T | G | 0.95 | -0.1139 | 0.0187 | 1.03E-09 |
| rs73141294  | T | C | 0.06 | 0.1287  | 0.0211 | 1.03E-09 |
| rs7520873   | A | G | 0.94 | -0.1285 | 0.0211 | 1.04E-09 |
| rs73145260  | A | C | 0.05 | 0.1153  | 0.0189 | 1.05E-09 |
| rs138789716 | A | G | 0.95 | -0.1143 | 0.0187 | 1.08E-09 |
| rs6692816   | A | G | 0.06 | 0.1263  | 0.0207 | 1.08E-09 |
| rs60425460  | A | G | 0.94 | -0.121  | 0.0199 | 1.10E-09 |
| rs73141301  | A | G | 0.06 | 0.1334  | 0.0219 | 1.20E-09 |
| rs11204589  | A | G | 0.15 | 0.0726  | 0.0119 | 1.22E-09 |
| rs73141297  | C | G | 0.94 | -0.1331 | 0.0219 | 1.24E-09 |
| rs12026307  | T | C | 0.05 | 0.114   | 0.0188 | 1.27E-09 |
| rs7535770   | A | C | 0.05 | 0.1135  | 0.0188 | 1.47E-09 |
| rs4474291   | A | G | 0.05 | 0.1134  | 0.0188 | 1.47E-09 |
| rs12028480  | A | G | 0.94 | -0.1178 | 0.0195 | 1.49E-09 |
| rs73141286  | T | C | 0.95 | -0.124  | 0.0205 | 1.53E-09 |
| rs12033940  | T | C | 0.95 | -0.1132 | 0.0187 | 1.54E-09 |
| rs57237504  | A | C | 0.06 | 0.1244  | 0.0206 | 1.58E-09 |
| rs73141283  | A | G | 0.95 | -0.1236 | 0.0205 | 1.60E-09 |
| rs73129418  | A | G | 0.06 | 0.1115  | 0.0185 | 1.65E-09 |
| rs12026297  | A | T | 0.06 | 0.1172  | 0.0194 | 1.66E-09 |
| rs6587419   | T | G | 0.14 | 0.0717  | 0.0119 | 1.71E-09 |
| rs73141281  | T | C | 0.05 | 0.1231  | 0.0204 | 1.72E-09 |
| rs10788751  | A | G | 0.16 | 0.0727  | 0.0121 | 1.77E-09 |
| rs11204588  | A | T | 0.86 | -0.0716 | 0.0119 | 1.78E-09 |
| rs12043363  | A | G | 0.06 | 0.1163  | 0.0193 | 1.78E-09 |
| rs11204587  | A | C | 0.14 | 0.0716  | 0.0119 | 1.79E-09 |
| rs10788752  | C | G | 0.16 | 0.0726  | 0.0121 | 1.80E-09 |



|             |   |   |      |         |        |          |
|-------------|---|---|------|---------|--------|----------|
| rs12047499  | A | G | 0.06 | 0.116   | 0.0193 | 1.84E-09 |
| rs74798649  | T | C | 0.05 | 0.1225  | 0.0204 | 1.86E-09 |
| rs73141272  | C | G | 0.95 | -0.122  | 0.0203 | 1.91E-09 |
| rs10888311  | C | G | 0.14 | 0.0716  | 0.0119 | 1.99E-09 |
| rs57684757  | T | C | 0.14 | 0.0724  | 0.0121 | 2.07E-09 |
| rs75149475  | A | G | 0.95 | -0.1232 | 0.0206 | 2.08E-09 |
| rs41295946  | A | G | 0.06 | 0.1151  | 0.0192 | 2.13E-09 |
| rs10788750  | T | C | 0.86 | -0.0707 | 0.0118 | 2.26E-09 |
| rs7527770   | A | C | 0.14 | 0.0702  | 0.0118 | 2.33E-09 |
| rs73141225  | T | C | 0.06 | 0.1138  | 0.0191 | 2.49E-09 |
| rs55937620  | A | G | 0.85 | -0.0729 | 0.0122 | 2.60E-09 |
| rs76530775  | A | T | 0.05 | 0.1136  | 0.0191 | 2.67E-09 |
| rs12042804  | A | C | 0.05 | 0.1134  | 0.0191 | 2.69E-09 |
| rs12562434  | A | G | 0.86 | -0.0723 | 0.0121 | 2.69E-09 |
| rs61856413  | T | C | 0.86 | -0.0717 | 0.0121 | 2.77E-09 |
| rs11204586  | C | G | 0.84 | -0.0713 | 0.012  | 2.81E-09 |
| rs73145253  | T | C | 0.14 | 0.0721  | 0.0121 | 2.85E-09 |
| rs6658227   | T | C | 0.14 | 0.0717  | 0.0121 | 2.94E-09 |
| rs12035071  | T | G | 0.05 | 0.1125  | 0.019  | 2.95E-09 |
| rs59385443  | A | G | 0.86 | -0.0718 | 0.0121 | 2.96E-09 |
| rs74824567  | A | G | 0.95 | -0.127  | 0.0214 | 2.98E-09 |
| rs12035070  | A | G | 0.05 | 0.1123  | 0.0189 | 3.06E-09 |
| rs12040091  | T | C | 0.95 | -0.1123 | 0.0189 | 3.06E-09 |
| rs111538251 | C | G | 0.05 | 0.1122  | 0.0189 | 3.10E-09 |
| rs78951761  | A | T | 0.05 | 0.1267  | 0.0214 | 3.12E-09 |
| rs10888313  | C | G | 0.95 | -0.1121 | 0.0189 | 3.16E-09 |
| rs6666048   | T | C | 0.86 | -0.0716 | 0.0121 | 3.25E-09 |
| rs12032193  | T | C | 0.05 | 0.1102  | 0.0186 | 3.35E-09 |
| rs28687288  | A | G | 0.53 | -0.0618 | 0.0105 | 3.47E-09 |
| rs76289694  | A | T | 0.86 | -0.0715 | 0.0121 | 3.77E-09 |
| rs6703679   | T | C | 0.94 | -0.1076 | 0.0183 | 3.87E-09 |
| rs12029352  | T | G | 0.05 | 0.1102  | 0.0187 | 4.00E-09 |
| rs12034735  | T | C | 0.05 | 0.1153  | 0.0196 | 4.02E-09 |
| rs55893924  | T | C | 0.85 | -0.0701 | 0.0119 | 4.28E-09 |
| rs4146708   | A | T | 0.05 | 0.1099  | 0.0188 | 4.68E-09 |
| rs28376879  | A | T | 0.53 | -0.0609 | 0.0104 | 5.42E-09 |
| rs4511156   | T | C | 0.15 | 0.0696  | 0.012  | 6.09E-09 |
| rs149316915 | A | G | 0.86 | -0.0749 | 0.0129 | 6.96E-09 |
| rs115484985 | T | C | 0.04 | 0.1316  | 0.0228 | 7.70E-09 |
| rs4614295   | T | C | 0.15 | 0.069   | 0.012  | 8.76E-09 |
| rs188697725 | T | C | 0.05 | 0.1173  | 0.0204 | 9.06E-09 |
| rs193191589 | A | C | 0.95 | -0.1173 | 0.0204 | 9.08E-09 |
| rs72763221  | A | G | 0.95 | -0.1262 | 0.022  | 9.39E-09 |
| rs4517381   | A | T | 0.88 | -0.079  | 0.0138 | 1.11E-08 |
| rs4501866   | T | C | 0.08 | 0.0893  | 0.0157 | 1.15E-08 |
| rs6669478   | A | G | 0.08 | 0.0893  | 0.0157 | 1.15E-08 |
| rs140976623 | A | C | 0.95 | -0.1201 | 0.0211 | 1.23E-08 |
| rs9435910   | T | C | 0.12 | 0.0791  | 0.0139 | 1.28E-08 |
| rs6587415   | T | C | 0.86 | -0.0702 | 0.0123 | 1.30E-08 |

|             |   |   |      |         |        |          |
|-------------|---|---|------|---------|--------|----------|
| rs7553764   | A | C | 0.88 | -0.0789 | 0.0139 | 1.31E-08 |
| rs145052285 | T | C | 0.05 | 0.12    | 0.0211 | 1.31E-08 |
| rs12041993  | T | G | 0.92 | -0.0891 | 0.0157 | 1.39E-08 |
| rs73141280  | T | C | 0.12 | 0.0789  | 0.0139 | 1.39E-08 |
| rs58722933  | T | C | 0.08 | 0.0889  | 0.0157 | 1.41E-08 |
| rs6675835   | A | C | 0.92 | -0.0888 | 0.0157 | 1.47E-08 |
| rs28749860  | A | G | 0.12 | 0.0791  | 0.014  | 1.49E-08 |
| rs3010199   | T | C | 0.09 | 0.0888  | 0.0157 | 1.50E-08 |
| rs41295944  | T | C | 0.08 | 0.0881  | 0.0156 | 1.65E-08 |
| rs10788756  | A | G | 0.85 | -0.0683 | 0.0121 | 1.72E-08 |
| rs7545169   | A | T | 0.08 | 0.0886  | 0.0157 | 1.80E-08 |
| rs28837817  | A | T | 0.88 | -0.0787 | 0.014  | 1.80E-08 |
| rs7553029   | A | T | 0.91 | -0.0892 | 0.0158 | 1.82E-08 |
| rs3001301   | A | G | 0.85 | -0.0681 | 0.0121 | 1.83E-08 |
| rs12040974  | A | C | 0.08 | 0.0893  | 0.0159 | 1.85E-08 |
| rs12042271  | A | T | 0.92 | -0.0893 | 0.0159 | 1.86E-08 |
| rs12038290  | A | G | 0.08 | 0.0893  | 0.0159 | 1.88E-08 |
| rs12093163  | A | G | 0.86 | -0.0694 | 0.0123 | 1.90E-08 |
| rs116291302 | T | C | 0.92 | -0.089  | 0.0159 | 2.03E-08 |
| rs12037196  | T | G | 0.08 | 0.0893  | 0.0159 | 2.05E-08 |
| rs6699753   | C | G | 0.85 | -0.0683 | 0.0122 | 2.05E-08 |
| rs9435907   | A | G | 0.15 | 0.0685  | 0.0122 | 2.05E-08 |
| rs9435899   | T | G | 0.15 | 0.0676  | 0.0121 | 2.17E-08 |
| rs12040557  | A | G | 0.92 | -0.0889 | 0.0159 | 2.36E-08 |
| rs12023592  | T | C | 0.95 | -0.1336 | 0.0239 | 2.43E-08 |
| rs59447628  | A | G | 0.08 | 0.089   | 0.016  | 2.56E-08 |
| rs142728151 | A | G | 0.02 | 0.1854  | 0.0334 | 2.92E-08 |
| rs10749643  | T | C | 0.82 | -0.0683 | 0.0123 | 3.03E-08 |
| rs61856398  | T | C | 0.87 | -0.0688 | 0.0124 | 3.14E-08 |
| rs6587416   | A | G | 0.87 | -0.0687 | 0.0124 | 3.15E-08 |
| rs61856399  | A | G | 0.13 | 0.0686  | 0.0124 | 3.41E-08 |
| rs9435877   | T | C | 0.85 | -0.0698 | 0.0126 | 3.47E-08 |
| rs6684616   | A | T | 0.15 | 0.0693  | 0.0126 | 3.52E-08 |
| rs6659253   | T | C | 0.85 | -0.0698 | 0.0127 | 4.18E-08 |
| rs9435912   | T | G | 0.85 | -0.0694 | 0.0127 | 4.50E-08 |
| rs6699713   | T | C | 0.15 | 0.0694  | 0.0127 | 4.74E-08 |
| rs6655937   | A | C | 0.85 | -0.0694 | 0.0127 | 4.78E-08 |
| rs9435884   | C | G | 0.15 | 0.0704  | 0.0129 | 4.79E-08 |
| rs11804999  | A | C | 0.14 | 0.0693  | 0.0127 | 4.80E-08 |
| rs61856443  | T | C | 0.85 | -0.0693 | 0.0127 | 4.90E-08 |
| rs61856444  | T | G | 0.85 | -0.0693 | 0.0127 | 4.91E-08 |
| rs61856445  | T | G | 0.85 | -0.0693 | 0.0127 | 4.91E-08 |
| rs9435883   | T | C | 0.15 | 0.0693  | 0.0127 | 4.96E-08 |

**Supplemental Table 2.** Results of stepwise conditional analysis: SNPs that remain independently statistically significantly associated with asparagus anosmia after mutual adjustment

| SNP        | Locus     | Reference Allele | Alt Allele | Frequency of Reference Allele | Marginal Beta | Marginal SE | Conditional Beta | Conditional SE | Number of SNPs in LD group** | Heterogeneity chi-square*** | Heterogeneity p-value*** |
|------------|-----------|------------------|------------|-------------------------------|---------------|-------------|------------------|----------------|------------------------------|-----------------------------|--------------------------|
| rs13373863 | 247994384 | A                | G          | 0.07                          | 0.12          | 0.02        | 0.14             | 0.02           | 63                           | 0.85                        | 0.36                     |
| rs71538191 | 248306916 | C                | G          | 0.60                          | -0.16         | 0.01        | -0.10            | 0.01           | 0                            | 5.928                       | 0.01                     |
| rs6689553  | 248313953 | T                | C          | 0.32                          | 0.14          | 0.01        | 0.10             | 0.01           | 9                            | 3.642                       | 0.06                     |

LD = linkage disequilibrium

\*OR = Odds Ratio

\*\*SNPs with  $r^2 > 0.8$

\*\*\*Cochran's Q for heterogeneity

**Supplemental Table 3.** Percentages of those who can and cannot smell the odor across genotypes for each of the three independent variants.

| SNP        | Genotype | Anosmic | Can Smell |
|------------|----------|---------|-----------|
| rs13373863 | AA       | 0.17    | 0.36      |
|            | AG       | 9.09    | 13.65     |
|            | GG       | 90.75   | 85.98     |
| rs71538191 | CC       | 53.39   | 38.62     |
|            | CG       | 41.01   | 50.56     |
|            | GG       | 5.60    | 10.81     |
| rs6689553  | TT       | 5.31    | 8.30      |
|            | TC       | 35.05   | 45.90     |
|            | CC       | 59.64   | 43.61     |

**Supplemental Table 4.** Missense SNPs associated with asparagus anosmia at genome-wide significance ( $p < 5 \times 10^{-8}$ )

| SNP        | Gene           | Possible impact   | Polyphen score | Reference Allele | Alt Allele | Marginal Beta | Marginal SE | Marginal p-value | Lead SNP and $r^2$         |
|------------|----------------|-------------------|----------------|------------------|------------|---------------|-------------|------------------|----------------------------|
| rs6658227  | <i>OR2L3</i>   | Probably damaging | 0.97           | T                | C          | 0.07          | 0.01        | 2.94e-9          | rs13373863<br>$r^2 = 0.29$ |
| rs28545014 | <i>OR14C36</i> | Probably damaging | 1              | T                | G          | -0.07         | 0.01        | 3.53e-12         | rs71538191<br>$r^2 = 0.25$ |
| rs7555310  | <i>OR2M7</i>   | Probably damaging | 0.97           | A                | G          | 0.13          | 0.009       | 2.62 e-43        | rs6689553<br>$r^2 = 0.80$  |
| rs7555424  | <i>OR2M7</i>   | Possibly damaging | 0.85           | A                | G          | 0.13          | 0.009       | 2.50 e-43        | rs6689553<br>$r^2 = 0.80$  |

**Supplemental Table 5:** Genome-wide significant missense SNPs, VEP and Polyphen scores, and LD with the three lead SNPs identified in conditional analyses

| SNP        | A1 | A2 | b       | se     | p        | VEP Score                | Polyphen Score | LD rs13373863 (r <sup>2</sup> ) | LD rs71538191 (r <sup>2</sup> ) | LD rs6689553 (r <sup>2</sup> ) |
|------------|----|----|---------|--------|----------|--------------------------|----------------|---------------------------------|---------------------------------|--------------------------------|
| rs28377739 | A  | G  | -0.0717 | 0.0103 | 3.54E-12 | benign(0)                | 0.002          | 0.0002                          | 0.25                            | 0.31                           |
| rs28545014 | T  | G  | -0.0717 | 0.0103 | 3.53E-12 | probably_damaging(0.95)  | 1.00           | 0.0002                          | 0.25                            | 0.31                           |
| rs28599722 | A  | G  | 0.0679  | 0.0106 | 1.31E-10 | benign(0.001)            | 0              | 0.006                           | 0.15                            | 0.19                           |
| rs4244171  | C  | G  | 0.0589  | 0.0093 | 2.71E-10 | benign(0.06)             | 0              | 0.04                            | 0.08                            | 0.08                           |
| rs4916104  | T  | C  | 0.0581  | 0.0094 | 5.69E-10 | benign(0)                | 0              | 0.003                           | 0.08                            | 0.08                           |
| rs4916129  | T  | C  | -0.0802 | 0.0091 | 1.70E-18 | benign(0.232)            | 0.041          | 0.007                           | 0.23                            | 0.29                           |
| rs4916130  | A  | C  | -0.1309 | 0.0095 | 3.37E-43 | benign(0)                | 0              | 0.01                            | 0.44                            | 0.7                            |
| rs55937620 | A  | G  | -0.0729 | 0.0122 | 2.60E-09 | benign(0)                | 0              | 0.26                            | 0.008                           | 0.001                          |
| rs56834114 | A  | G  | -0.0815 | 0.015  | 5.50E-08 | benign(0.001)            | ----           | 0.17                            | 0.01                            | 0.006                          |
| rs6587467  | T  | G  | 0.0974  | 0.011  | 6.53E-19 | benign(0)                | 0              | 0.0003                          | 0.26                            | 0.38                           |
| rs6658227  | T  | C  | 0.0717  | 0.0121 | 2.94E-09 | probably_damaging(0.928) | 0.969          | 0.29                            | 0.007                           | 0.0005                         |
| rs6658256  | T  | C  | 0.0867  | 0.0141 | 8.97E-10 | benign(0)                | 0              | 0.25                            | 0.004                           | 0.0006                         |
| rs6666048  | T  | C  | -0.0716 | 0.0121 | 3.25E-09 | benign(0.001)            | 0              | 0.29                            | 0.007                           | 0.0003                         |
| rs6667171  | A  | C  | -0.131  | 0.0101 | 1.37E-38 | benign(0.092)            | 0.01           | 0.009                           | 0.54                            | 0.74                           |
| rs73141283 | A  | G  | -0.1236 | 0.0205 | 1.60E-09 | benign(0.077)            | ----           | 0.77                            | 6.95E-05                        | 0.005                          |
| rs7555310  | A  | G  | 0.1266  | 0.0092 | 2.62E-43 | possibly_damaging(0.566) | 0.969          | 0.01                            | 0.53                            | 0.8                            |
| rs7555424  | A  | G  | 0.1267  | 0.0092 | 2.50E-43 | possibly_damaging(0.481) | 0.85           | 0.01                            | 0.52                            | 0.8                            |
